# Supplementary material for: Chromatin modification by SUMO-1 stimulates the promoters of translation machinery genes
Source: PubMed Central journal article supplement — Nucleic Acids Res. 2012 Aug 30;40(20):10172–86. doi: 10.1093/nar/gks819 (PMC3488252; doi:10.1093/nar/gks819), 2012-08-30

## Supplementary information

### **Manuscript title: Chromatin modification by SUMO-1 stimulates the promoters of translation machinery genes**

Hui-wen Liu<sup>1</sup>, Jie Zhang<sup>1</sup>, George F. Heine<sup>1</sup>, Mansi Arora<sup>1</sup>, Hatice Gulcin Ozer<sup>1</sup>, Raghuram Onti-Srinivasan<sup>1</sup>, Kun Huang<sup>1</sup>, and Jeffrey D. Parvin<sup>1,\*</sup>

<sup>1</sup>The Department of Biomedical Informatics and the Ohio State University Comprehensive Cancer Center, The Ohio State University, Columbus, OH 43210, USA

\* To whom correspondence should be addressed. Tel: +1-614-292-0523; Fax: +1-614-688-6600; Email: [Jeffrey.Parvin@osumc.edu](mailto:Jeffrey.Parvin@osumc.edu)

Present Address: George F. Heine, Southern State Community College, Hillsboro, OH, USA

**Supplementary Figure S1: Characterization of HeLa-SUMO cell line. A.**

Illustration of His6-biotin-tagged SUMO-1 (HBT-SUMO-1) protein used in this study. Protein domains are not drawn to scale. The His6 domain binds to Ni-NTA matrix, and the naturally biotinylated domain binds to streptavidin matrix. **B.** Western blot analysis showing SUMOylated proteins in whole cell lysates from HeLa-SUMO (lane 1) and HeLa (lane 2) cells. The arrow indicates the recombinant SUMO-1 protein and the asterisk indicates the endogenous SUMO-1 protein. Left panel showed biotinylated conjugates detected using streptavidin linked with HRP, whereas the right panel showed the SUMO-1 conjugates detected using SUMO-1 antibody. **C.** Western blot showing the fractionation of SUMOylated chromatin from HeLa-SUMO cells. Chromatin was isolated in the presence of high salt and fragmented by sonication (lane 1). The isolated chromatin was then purified using the Ni-NTA metal ion affinity matrix (lane 2) and subsequently using streptavidin-agarose (lane 3) affinity purification. **D.** Flow cytometry analysis of DNA content of the samples used for ChAP-seq analysis. HeLa-SUMO cells were double blocked in thymidine and released for 13 h (G1), 0 h (S0), 3 h (S3), or 6 h (S6), or the cells were blocked in thymidine and released into nocodazole (M) as described in the Methods section. **E.** FACS analysis of phospho-H3 and propidium iodide stained cells arrested using the thymidine/nocodazole protocol.

**Supplementary Figure S2: Binding patterns of tagged-SUMO-1 detected by ChAP-seq are highly similar to the binding patterns of native SUMO-1**

**detected by ChIP-seq. A.** Histogram of the tag densities (bin size =1 kb) of SUMO-1 binding sites on chromosome 1 of the human genome (hg 18) in the S0 sample by using two types of purification strategy, ChIP-seq and ChAP-seq. The frequency of raw reads was plotted along the length of the chromosome 1. Samples were: ChAP-SUMO purified DNAs from HeLa-SUMO cells during S0 (red, panel 1, top), ChIP-SUMO purified DNAs using SUMO-1 specific IgG antibody and chromatin from HeLa cells that do not express tagged SUMO-1 (black, panel 2), ChIP using purified IgG from the matched pre-immune IgG (gray, panel 3). A diagram of chromosome 1 is shown at the bottom. **B.** SUMO-1 binding tracing for a representative stretch of chromosome 1. A ~750 kb multi-gene cluster is shown and detected SUMO-1 tag density is shown for the tagged SUMO-1 (red, top), endogenous SUMO-1 immunoprecipitated using SUMO-1 specific IgG (black, middle), and endogenous chromatin immunoprecipitated using pre-immune IgG (gray, bottom). **C.** *NOSIP* gene as an example of SUMO-1 tracing in IGV genome browser shows the consistency among the ChAP-seq samples and the ChIP-seq samples. Three replicates are shown of the early S phase (S0) ChAP-seq results (S0-1 to -3), ChAP-seq from an untagged cell line (fourth tier), ChIP-seq using SUMO-1 specific IgG (fifth tier) and ChIP-seq using pre-immune IgG (bottom tier). **D.** Scatter plot analysis of the peaks of ChIP-SUMO-1 (x-axis) against those of the double-affinity purified tagged-SUMO-1 (y-axis). The Pearson correlation coefficient ( $R$ ) between these two methods is 0.989.

**Supplementary Figure S3: SUMO-1 marks chromatin at active sites on human genome.** **A.** The analysis in Figure 1B is shown with percentages of SUMO-1 reads shown, as opposed to fold-change shown in Figure 1B. Peak annotation depicts the percentage of SUMO-1 binding sites on defined sequence elements in the human genome (hg 18). G1 (blue), early S phase (S0, red), mid S phase (S3, green), late S phase (S6, purple), and mitosis (M, orange), and error bars are SEM from three biological repeats. The black bar represents the frequency of the genetic element in the genome and the expected percentage of the reads if the SUMO-1 locations were random. **B.** Peak annotation depicts of SUMO-1 binding sites on promoter region (5 kb upstream of TSSs as in Panel A; left) and promoters that have no CpG islands (right). **C.** Peak annotation depicts of SUMO-1 binding percentage on exon1 or exon (1+2+3) region (gray) compared to exon distribution in the genome (black).

**Supplementary Figure S4: SUMO-1 binding pattern associates with highly transcribed genes in synchronized cells.** A histogram is shown of the average gene expression of high SUMO-1-labeled genes (gray) and low SUMO-1-labeled genes (black) from various cell cycle stages using a cell-cycle synchronized HeLa cell mRNA microarray dataset (GSE26922). High SUMO-1-labeled genes are defined as those genes for which the SUMO-1 average tag density at the promoter was the 10% highest, and low SUMO-1 labeled genes are defined as those upstream of genes for which the SUMO-1 average tag density were the

10% least abundant in ChAP-seq datasets. (\*, the data of S12 from GSE26922 was used for G1; \*\*, S4 from GSE26922 was used for S3 in this study.

**Supplementary Figure S5: RNA-seq showing the high reproducibility of biological replicates.** Scatter plot shows the FPKM of each gene from replicate 2 (y-axis) against replicate 1 (x-axis). Pearson correlation coefficient is shown in *R*. Scatter plot for replicates from the control siRNA (*top*) and the SUMO-1 specific siRNA (*bottom*) are shown.

**Supplementary Figure S6: Validation of RNA-seq data under SUMO-1 depletion showing an enrichment of genes that encodes protein translation factors.** **A.** Pathway analysis results for genes affected by SUMO-1 depletion are shown. The histogram shows the down regulated (blue) and up regulated genes (red) secondary to SUMO-1 depletion have statistically significant enrichment for the indicated functions. The x-axis is the  $-\log(p\text{-value})$ . **B.** Heat map of those genes that significantly changed expression following depletion of SUMO-1 and which are classified as encoding protein translation factors. The expression intensities were row-wise scaled for the specified genes determined to be significantly changed (adj.  $p\text{-value} < 0.05$ ). Green color indicates lower relative expression and red indicates higher relative expression. **C.** A second siRNA specific for SUMO-1 was used for validation of RNA-seq data shown in Figure 6C. Fold change relative to the control siRNA is represented in  $\log_2$  scale for SUMO-1 depletion. The mRNA expression level for each experiment was normalized to

Polr2a (a non-SUMO-1-labeled gene) and to the result with the control siRNA. Four biological replicates were done and error bars reflect the SEM. A western blot is shown to evaluate SUMO-1 protein depletion by the indicated siRNA transfection.

**Supplementary Figure S7: SUMO-1 marks on promoter of ribosomal protein genes.** Examples of SUMO-1 tracing on specific promoters in G1 phase, mitosis from ChAP-seq data, and S0 phase from ChIP-seq data, are shown above the gene map drawn from the IGV genome browser. Genes shown are *RPL5*, *RPL7A*, *RPL10A*, *RPL26*, *SLC1A3*, and *PKM2*.

**Supplementary Table S1. Overlapping of mapped reads between biological replicates of ChAP-seq experiments**

| Overlapping among samples (%) |           |           |           |
|-------------------------------|-----------|-----------|-----------|
|                               | S0_091117 | S0_100604 | S0_100719 |
| S0_091117                     | 100       | 61        | 56        |
| S0_100604                     |           | 100       | 52        |
| S0_100719                     |           |           | 100       |
|                               | S3_091117 | S3_100604 | S3_100719 |
| S3_091117                     | 100       | 91        | 79        |
| S3_100604                     |           | 100       | 78        |
| S3_100719                     |           |           | 100       |
|                               | S6_091221 | S6_100604 | S6_100812 |
| S6_091221                     | 100       | 87        | 77        |
| S6_100604                     |           | 100       | 79        |
| S6_100812                     |           |           | 100       |
|                               | M0_100719 | M0_100604 | M0_100812 |
| M0_100719                     | 100       | 41        | 42        |
| M0_100604                     |           | 100       | 74        |
| M0_100812                     |           |           | 100       |
|                               | G1_100719 | G1_100604 | G1_100831 |
| G1_100719                     | 100       | 89        | 95        |
| G1_100604                     |           | 100       | 79        |
| G1_100831                     |           |           | 100       |

**Supplementary Table S2. Ingenuity Pathway Analysis of 127 genes with constant SUMO-1 marks on active promoters during interphase.**

| <b>Category</b>   | <b>p-Value</b> | <b>Molecules</b>                                                                                                                                                                                                                                                                                                                                                                                                                                                                                       | <b># Molecules</b> |
|-------------------|----------------|--------------------------------------------------------------------------------------------------------------------------------------------------------------------------------------------------------------------------------------------------------------------------------------------------------------------------------------------------------------------------------------------------------------------------------------------------------------------------------------------------------|--------------------|
| Protein Synthesis | 6.68E-08       | ALG3, DTL, EEF2, MRPL13, MYC, PSMB3, PSMC2, RPL13, RPL18, RPL32, RPL36, RPL38, RPL18A, RPL36A, RPS24, RPS27, RPS29, TNRC6B, WARS                                                                                                                                                                                                                                                                                                                                                                       | 19                 |
| Cancer            | 1.40E-04       | ABCD3, AHCYL1, AKAP12, ALG3, ANXA2, BMP6, CD9, CD58, CDKN1C, CNP, CRYZ, CX3CL1, CYR61, DUSP1, ETFA, FTH1, ILF2, JAK1, LASP1, LASS2, LEPR, LRRC8D, MAP1LC3B, MRCL3, MRPL13, MYC, PDCD6, PERP, PHLDA2, PPP1R3C, PRKACB, PRMT1, PSMD4, PTMA, PTPRF, RAE1, S100A2, SLC7A5, SLC9A3R1, STAT3, TMEM106C, TNRC6B, TPD52, TPD52L1, TPM1, TRIP13, USP1, WARS, ZYX                                                                                                                                                | 49                 |
| Cell Cycle        | 4.25E-04       | AKAP12, ALG3, BMP6, CDKN1C, CREG1, CYR61, DDB1, DTL, DUSP1, GNAI3, MYC, PDCD6, PRMT5, PRPF4, PTPRF, RPS27L, STAT3, TPD52L1, TPM1, TRIP13                                                                                                                                                                                                                                                                                                                                                               | 20                 |
| Other             | -              | ACADM, AP3D1, BASP1, BHLHB2, BRD9, BRMS1, CCDC72, CLPTM1, CS, DDT, DDX23, DDX27, DDX47, DNASE2, DPP8, DYNC1H1, FAM32A, GGA1, GRPEL1, GTF2IRD1, HMGNA4, HSPA9, IARS2, KIAA0100, KIAA0947, LTA4H, M6PRBP1, MAPKAPK3, MARCH6, MLF2, MORF4L2, MRPS12, MTX1, NAPA, NPDC1, NPR3, NPTN, NUP85, OLFML2A, OXCT1, PCBP2, PERP, PH-4, POP5, PPM1J, PSMB7, PSMD1, RAB13, RHOD, S100A10, SEC16A, SEP15, TARS, TEGT, TMED2, TMEM161A, TNRC6B, TOR3A, TPD52, TSC22D3, TTC19, U2AF2, UBE2Q1, UROD, USP13, WDR74, WDR79 | 67                 |



**Supplementary Table S3. Statistics of RNA-seq experiments.**

| <b>Replicate</b> | <b>Sample</b> | <b>Reads processed</b> | <b>Unique reads aligned (&gt;1 time) in hg18 (%)</b> | <b>Reads failed to align (%)</b> | <b>Reads suppressed due to aligned &gt;40 locations (%)</b> |
|------------------|---------------|------------------------|------------------------------------------------------|----------------------------------|-------------------------------------------------------------|
| 1                | siCtrl        | 7,503,876              | 79.85                                                | 19.17                            | 0.98                                                        |
|                  | siSUMO-1      | 6,539,732              | 80.11                                                | 18.78                            | 1.11                                                        |
| 2                | siCtrl        | 6,295,830              | 80.24                                                | 18.73                            | 1.02                                                        |
|                  | siSUMO-1      | 5,225,102              | 79.72                                                | 18.99                            | 1.29                                                        |
| 3                | siCtrl        | 9,655,866              | 79.21                                                | 19.57                            | 1.22                                                        |
|                  | siSUMO-1      | 5,774,962              | 80.40                                                | 18.33                            | 1.26                                                        |

**Supplementary Table S4. Genes with significant change under SUMO-1 depletion based on RNA-seq experiments (cut off range: FPKM> 1).**

| RefSeq gene | SUMO-1 peak in promoter in G1 phase | Avg FPKM (Ctrlsi) | Avg FPKM (SUMO1si) | Fold Change | p-value     | Locus                     |
|-------------|-------------------------------------|-------------------|--------------------|-------------|-------------|---------------------------|
| GAPDH       | +                                   | 3165.56           | 2896.61            | -1.09285    | 0.000554101 | chr12:6513917-6517797     |
| ACTB        | +                                   | 2281.17           | 1923.1             | -1.18619    | 3.48E-08    | chr7:5533304-5536758      |
| TMSB10      |                                     | 1617.74           | 1401.93            | -1.15394    | 8.71E-05    | chr2:84986273-84987310    |
| GNB2L1      | +                                   | 1379.36           | 1223.64            | -1.12726    | 0.00228591  | chr5:180596533-180603512  |
| ENO1        |                                     | 1276.72           | 987.07             | -1.29344    | 1.27E-09    | chr1:8843649-8861367      |
| RPS8        |                                     | 1251.12           | 933.284            | -1.34056    | 1.23E-11    | chr1:45013832-45016999    |
| PKM2        | +                                   | 1241.43           | 996.898            | -1.24529    | 2.49E-07    | chr15:70278423-70310738   |
| RPL5        | +                                   | 1161.8            | 722.933            | -1.60706    | 0           | chr1:93070181-93080069    |
| B2M         |                                     | 1154.14           | 1579.76            | 1.36878     | 4.44E-16    | chr15:42790976-42797649   |
| HSPA8       | +                                   | 1090.08           | 958.194            | -1.13764    | 0.00359087  | chr11:122433409-122438054 |
| RPL4        |                                     | 1037.73           | 755.899            | -1.37284    | 3.35E-11    | chr15:64578706-64584238   |
| SLC7A5      | +                                   | 1031.66           | 1251.49            | 1.21308     | 4.36E-06    | chr16:86421129-86460601   |
| TPT1        |                                     | 1023.06           | 890.409            | -1.14898    | 0.0024451   | chr13:44809303-44813297   |
| EEF2        | +                                   | 992.521           | 816.635            | -1.21538    | 3.65E-05    | chr19:3927053-3936461     |
| PFN1        | +                                   | 981.316           | 731.969            | -1.34065    | 1.94E-09    | chr17:4789691-4792570     |
| RPL26       | +                                   | 971.445           | 391.778            | -2.47958    | 0           | chr17:8221558-8227290     |
| CALR        | +                                   | 951.483           | 596.969            | -1.59386    | 0           | chr19:12910413-12916304   |
| ATP5B       |                                     | 946.618           | 1171.5             | 1.23756     | 1.08E-06    | chr12:55318225-55326119   |
| S100A11     |                                     | 920.46            | 707.935            | -1.3002     | 1.51E-07    | chr1:150271605-150276135  |
| FTH1        | +                                   | 911.095           | 1395.36            | 1.53152     | 0           | chr11:61473931-61491708   |
| HSP90AB1    | +                                   | 907.395           | 779.016            | -1.1648     | 0.00178944  | chr6:44322826-44329592    |
| KRT18       | +                                   | 872.548           | 484.695            | -1.8002     | 0           | chr12:51628921-51632952   |
| RPS16       | +                                   | 864.082           | 736.862            | -1.17265    | 0.00149221  | chr19:44615686-44618458   |
| RPL3        | +                                   | 843.773           | 491.911            | -1.7153     | 0           | chr22:38038832-38045616   |
| RPL23       |                                     | 826.394           | 671.805            | -1.23011    | 6.70E-05    | chr17:34259846-34263579   |
| TUBA1B      |                                     | 776.795           | 614.691            | -1.26372    | 1.45E-05    | chr12:47807832-47811571   |
| VIM         |                                     | 751.623           | 435.162            | -1.72723    | 0           | chr10:17310263-17319598   |
| BSG         |                                     | 693.236           | 537.081            | -1.29075    | 9.01E-06    | chr19:522324-534493       |
| FTL         |                                     | 690.837           | 1233.29            | 1.78521     | 0           | chr19:54160377-54161948   |
| KRT7        | +                                   | 678.338           | 405.714            | -1.67196    | 2.22E-16    | chr12:50913220-50928976   |
| TFRC        |                                     | 670.096           | 568.355            | -1.17901    | 0.00387978  | chr3:197260551-197293429  |
| TUBA1C      | +                                   | 631.553           | 471.667            | -1.33898    | 1.61E-06    | chr12:47945131-47953380   |
| EEF1A1      | +                                   | 630.907           | 519.952            | -1.21339    | 0.00109238  | chr6:74282193-74287476    |
| CTSZ        |                                     | 627.842           | 511.921            | -1.22644    | 0.000608803 | chr20:57003637-57015704   |
| NPM1        | +                                   | 602.972           | 388.209            | -1.55321    | 1.33E-11    | chr5:170747312-170770492  |
| HSP90AA1    |                                     | 594.872           | 371.225            | -1.60246    | 1.01E-12    | chr14:101616827-101675839 |
| MYL6        |                                     | 590.916           | 449.453            | -1.31474    | 1.25E-05    | chr12:54838366-54841633   |
| EIF4G2      | +                                   | 585.943           | 453.567            | -1.29186    | 4.23E-05    | chr11:10775168-10787158   |
| KRT8        | +                                   | 531.433           | 374.041            | -1.42079    | 1.95E-07    | chr12:51577237-51585135   |
| RPS19       |                                     | 528.147           | 689.392            | 1.3053      | 4.08E-06    | chr19:47055827-47067324   |

|           |   |         |         |          |             |                           |
|-----------|---|---------|---------|----------|-------------|---------------------------|
| RPL13A    |   | 519.182 | 334.026 | -1.55432 | 3.22E-10    | chr19:54682676-54687376   |
| TMSL3     | + | 502.532 | 383.565 | -1.31016 | 0.000182186 | chrX:12903145-12905267    |
| LGALS1    |   | 492.092 | 255.141 | -1.92871 | 0           | chr22:36401558-36405755   |
| ASS1      | + | 490.189 | 307.008 | -1.59667 | 1.29E-10    | chr9:132309914-132366482  |
| RPL7A     | + | 483.392 | 375.321 | -1.28794 | 0.000232661 | chr9:135204889-135208101  |
| RPL10A    | + | 482.116 | 393.341 | -1.22569 | 0.00274277  | chr6:35544155-35546536    |
| CD55      | + | 468.155 | 361.557 | -1.29483 | 0.000223919 | chr1:205561439-205600934  |
| RPS9      |   | 460.391 | 376.197 | -1.2238  | 0.00366156  | chr19:59396537-59403327   |
| SCD       | + | 444.112 | 279.021 | -1.59168 | 1.17E-09    | chr10:102096761-102114578 |
| RPS25     |   | 435.905 | 337.471 | -1.29168 | 0.000302572 | chr11:118374061-118394267 |
| S100P     |   | 431.097 | 236.341 | -1.82405 | 1.12E-13    | chr4:6746466-6749798      |
| ANXA2P2   |   | 425.74  | 314.374 | -1.35425 | 4.54E-05    | chr9:33614222-33615532    |
| SLC3A2    | + | 423.742 | 546.605 | 1.28995  | 8.47E-05    | chr11:62380093-62412929   |
| PRDX6     | + | 416.744 | 328.344 | -1.26923 | 0.00123412  | chr1:171713108-171724569  |
| HNRNPA2B1 |   | 415.326 | 321.44  | -1.29208 | 0.000561805 | chr7:26196080-26206938    |
| HDGF      | + | 410.071 | 281.867 | -1.45484 | 1.29E-06    | chr1:154978522-154988864  |
| TAGLN2    |   | 379.476 | 205.769 | -1.84418 | 1.55E-12    | chr1:158154526-158161908  |
| SPINK4    |   | 375.621 | 142.765 | -2.63104 | 0           | chr9:33209069-33501047    |
| PSMA5     | + | 365.415 | 251.668 | -1.45197 | 5.30E-06    | chr1:109745994-109770560  |
| TM4SF1    | + | 359.869 | 446.112 | 1.23965  | 0.0024295   | chr3:150569494-150578258  |
| UQCRH     |   | 355.619 | 454.048 | 1.27678  | 0.000559426 | chr1:46541966-46555034    |
| DBI       |   | 355.054 | 263.45  | -1.34771 | 0.000243507 | chr2:119840973-119846592  |
| PTMA      | + | 353.498 | 265.704 | -1.33042 | 0.000437733 | chr2:232281478-232286494  |
| COX4I1    |   | 348.771 | 429.39  | 1.23115  | 0.00391642  | chr16:84390696-84398108   |
| GPX4      |   | 340.213 | 252.518 | -1.34728 | 0.000332962 | chr19:1054935-1057787     |
| MYL12B    |   | 334.074 | 435.61  | 1.30393  | 0.000269197 | chr18:3252110-3268280     |
| ANXA2     | + | 333.349 | 251.976 | -1.32294 | 0.000802544 | chr15:58426641-58477477   |
| H19       |   | 310.893 | 185.012 | -1.68039 | 2.27E-08    | chr11:1972981-1975641     |
| RBBP7     |   | 307.388 | 236.869 | -1.29771 | 0.00257628  | chrX:16772697-16798455    |
| H2AFZ     |   | 302.823 | 212.105 | -1.4277  | 6.99E-05    | chr4:101088266-101090535  |
| IFITM3    |   | 286.446 | 478.899 | 1.67186  | 5.96E-12    | chr11:309672-310914       |
| MGST3     | + | 285.35  | 216.446 | -1.31834 | 0.00216804  | chr1:163867073-163891479  |
| PCBP1     |   | 284.363 | 199.675 | -1.42413 | 0.000128487 | chr2:70168088-70169836    |
| IFI30     |   | 284.226 | 383.45  | 1.3491   | 0.000130394 | chr19:18145578-18149927   |
| PHB2      | + | 266.602 | 187.825 | -1.41942 | 0.000214442 | chr12:6944777-6950177     |
| ECEL1     |   | 261.868 | 386.232 | 1.47491  | 1.21E-06    | chr2:233052780-233060776  |
| ANXA1     | + | 260.209 | 144.685 | -1.79845 | 1.52E-08    | chr9:74956600-74975127    |
| CYBA      |   | 258.076 | 179.378 | -1.43873 | 0.000182553 | chr16:87237197-87244958   |
| SERPINB6  | + | 250.202 | 181.426 | -1.37909 | 0.000980085 | chr6:2893391-2917089      |
| HSPB1     |   | 247.495 | 164.468 | -1.50482 | 4.86E-05    | chr7:75769810-75771549    |
| COX6C     |   | 246.976 | 343.455 | 1.39064  | 7.73E-05    | chr8:100959547-100975071  |
| SQSTM1    |   | 246.643 | 189.497 | -1.30157 | 0.00153201  | chr5:179157204-179218446  |
| EIF3E     | + | 246.062 | 183.465 | -1.34119 | 0.00261675  | chr8:109283147-109330135  |
| FKBP10    |   | 243.292 | 170.559 | -1.42644 | 0.000375776 | chr17:37222487-37232995   |
| ID1       |   | 240.035 | 180.711 | -1.32828 | 0.00399233  | chr20:29656752-29657974   |
| ILF2      | + | 237.655 | 146.588 | -1.62124 | 4.21E-06    | chr1:151901137-151910103  |
| TXNRD1    |   | 236.811 | 104.429 | -2.26767 | 3.04E-12    | chr12:103133688-103268192 |
| EIF2S3    | + | 232.8   | 298.778 | 1.28341  | 0.00431443  | chrX:23982985-24006851    |
| COX6A1    |   | 232.64  | 308.797 | 1.32736  | 0.00110618  | chr12:119360286-119362912 |
| CRIP1     |   | 229.783 | 114.976 | -1.99853 | 1.35E-09    | chr14:105024301-105026169 |
| CLU       | + | 226.454 | 149.459 | -1.51516 | 8.06E-05    | chr8:27510367-27528244    |

|          |   |         |         |          |             |                           |
|----------|---|---------|---------|----------|-------------|---------------------------|
| PON2     |   | 225.835 | 299.728 | 1.3272   | 0.00131628  | chr7:94872109-94902320    |
| FDPS     | + | 222.012 | 157.956 | -1.40553 | 0.000138641 | chr1:153545162-153567533  |
| PTMS     | + | 221.692 | 137.342 | -1.61416 | 1.04E-05    | chr12:6745801-6750379     |
| ACADVL   |   | 213.496 | 141.459 | -1.50924 | 0.000115705 | chr17:7033933-7069309     |
| LMNA     | + | 212.428 | 153.635 | -1.38268 | 0.00269446  | chr1:154351084-154376502  |
| PTGES3   | + | 207.434 | 141.212 | -1.46895 | 0.000423797 | chr12:55343391-55368345   |
| ATP1B3   |   | 206.665 | 342.083 | 1.65525  | 1.06E-08    | chr3:143078159-143128072  |
| EIF3H    |   | 206.603 | 98.3222 | -2.10129 | 1.36E-09    | chr8:117726235-117837243  |
| ECH1     |   | 204.159 | 105.608 | -1.93318 | 3.81E-08    | chr19:43997901-44014337   |
| LGALS3   |   | 203.47  | 140.024 | -1.45311 | 0.000668302 | chr14:54665624-54681901   |
| DSTN     | + | 203.197 | 127.685 | -1.59139 | 3.89E-05    | chr20:17498598-17536652   |
| S100A10  | + | 199.891 | 107.045 | -1.86735 | 1.84E-07    | chr1:150222009-150233338  |
| STMN1    |   | 198.924 | 121.174 | -1.64164 | 1.70E-05    | chr1:26083264-26105955    |
| LAPTM4B  |   | 198.369 | 263.426 | 1.32796  | 0.00255049  | chr8:98856984-98934006    |
| PSMA7    |   | 196.165 | 120.468 | -1.62836 | 2.53E-05    | chr20:60145185-60151869   |
| AP2M1    |   | 190.846 | 269.025 | 1.40964  | 0.00028586  | chr3:185375327-185384573  |
| EIF3D    | + | 190.716 | 120.965 | -1.57662 | 8.97E-05    | chr22:35236842-35255223   |
| COTL1    | + | 190.633 | 81.226  | -2.34695 | 1.21E-10    | chr16:83156704-83209170   |
| ATP6V0C  |   | 190.103 | 270.033 | 1.42046  | 0.000209575 | chr16:2503953-2510220     |
| CBX3     |   | 187.39  | 122.597 | -1.5285  | 0.000260417 | chr7:26207623-26219501    |
| GSTM1    |   | 186.907 | 69.7136 | -2.68107 | 2.10E-12    | chr1:110031940-110037889  |
| MYC      | + | 186.51  | 135.464 | -1.37682 | 0.00461513  | chr8:128817496-128822860  |
| ANP32B   | + | 185.238 | 112.767 | -1.64266 | 3.25E-05    | chr9:99785309-99818045    |
| PEBP1    |   | 184.565 | 266.711 | 1.44508  | 0.000120479 | chr12:117058252-117067773 |
| JUP      | + | 182.595 | 242.119 | 1.32599  | 0.00400442  | chr17:37164384-37196490   |
| NPTX1    |   | 180.415 | 115.154 | -1.56673 | 0.000167017 | chr17:76055227-76064999   |
| TMEM106C | + | 179.06  | 98.3703 | -1.82026 | 1.82E-06    | chr12:46643596-46648927   |
| FASN     |   | 177.218 | 124.116 | -1.42784 | 0.00234278  | chr17:77629502-77649395   |
| LAMA1    |   | 177.009 | 291.775 | 1.64836  | 1.56E-07    | chr18:6931885-7107813     |
| PDHA1    |   | 171.12  | 89.3322 | -1.91555 | 6.24E-07    | chrX:19271931-19410315    |
| GLO1     |   | 168.203 | 116.297 | -1.44632 | 0.00221368  | chr6:38751679-38778930    |
| LAMP1    | + | 166.428 | 251.769 | 1.51278  | 3.42E-05    | chr13:112999469-113025742 |
| SEPP1    | + | 166.237 | 251.2   | 1.5111   | 3.39E-05    | chr5:42792676-42847781    |
| DEGS1    |   | 163.54  | 326.7   | 1.99768  | 6.26E-13    | chr1:222437550-222447765  |
| BCAP31   |   | 163.118 | 228.042 | 1.39802  | 0.00110101  | chrX:152619140-152643395  |
| CTSC     | + | 161.843 | 76.6107 | -2.11254 | 1.30E-07    | chr11:87666407-87710589   |
| PRSS23   |   | 161.249 | 239.394 | 1.48462  | 0.000104956 | chr11:86189138-86199921   |
| CSRP1    | + | 158.203 | 245.658 | 1.5528   | 1.58E-05    | chr1:199719282-199743010  |
| RPL17    |   | 153.241 | 105.196 | -1.45672 | 0.00307936  | chr18:45268853-45272904   |
| SF3B4    |   | 145.382 | 99.5702 | -1.4601  | 0.00361797  | chr1:148161834-148166326  |
| NOLC1    |   | 141.839 | 64.63   | -2.19463 | 1.63E-07    | chr10:103901922-103913617 |
| PA2G4    |   | 140.067 | 91.3182 | -1.53383 | 0.00147036  | chr12:54784369-54793961   |
| TMED9    |   | 139.846 | 93.2077 | -1.50037 | 0.00241195  | chr5:176951818-176955705  |
| TNFSF9   |   | 139.447 | 195.16  | 1.39953  | 0.00243392  | chr19:6482009-6486939     |
| TOB1     |   | 138.59  | 81.5237 | -1.7     | 0.000143724 | chr17:46294585-46296412   |
| NDUFA13  |   | 137.914 | 222.521 | 1.61348  | 1.01E-05    | chr19:19488018-19500013   |
| SEC61A1  |   | 137.644 | 222.097 | 1.61356  | 1.03E-05    | chr3:129253901-129273216  |
| CDK4     |   | 136.978 | 89.296  | -1.53398 | 0.00113387  | chr12:56425050-56432431   |
| EIF4A2   | + | 136.418 | 196.482 | 1.44029  | 0.000190722 | chr3:187984054-188007178  |
| PTP4A2   | + | 133.386 | 199.179 | 1.49325  | 0.000341518 | chr1:32146379-32176575    |
| MYBL2    |   | 131.828 | 54.7774 | -2.40661 | 4.68E-08    | chr20:41729122-41778536   |

|           |   |         |         |          |             |                           |
|-----------|---|---------|---------|----------|-------------|---------------------------|
| SF3B2     |   | 130.052 | 79.7287 | -1.63118 | 0.000581607 | chr11:65576391-65592958   |
| MOSC1     | + | 128.663 | 83.7188 | -1.53685 | 0.00221052  | chr1:219026661-219054363  |
| PPT1      |   | 127.465 | 67.5144 | -1.88797 | 2.48E-05    | chr1:40310968-40335729    |
| SLC1A3    | + | 125.652 | 209.534 | 1.66757  | 6.02E-06    | chr5:36642213-36724193    |
| PLOD2     | + | 123.48  | 71.3675 | -1.7302  | 0.000227066 | chr3:147269917-147361972  |
| PRR13     |   | 119.754 | 56.6394 | -2.11432 | 3.73E-06    | chr12:52121699-52126694   |
| ATP6V0B   |   | 119.548 | 190.993 | 1.59763  | 5.91E-05    | chr1:44213188-44216559    |
| C19orf53  | + | 118.008 | 76.9435 | -1.5337  | 0.00351422  | chr19:13746256-13750586   |
| CHCHD10   |   | 117.264 | 76.5987 | -1.53089 | 0.00374757  | chr22:22435207-22440141   |
| GNG11     |   | 117.082 | 49.8139 | -2.35039 | 4.38E-07    | chr7:93388951-93393762    |
| NAP1L1    |   | 116.945 | 62.7968 | -1.86228 | 7.12E-05    | chr12:74724938-74765005   |
| HEXB      |   | 112.645 | 168.612 | 1.49684  | 5.00E-05    | chr5:74016724-74098798    |
| MST4      |   | 112.526 | 68.6696 | -1.63866 | 0.00128021  | chrX:130984925-131037652  |
| C19orf33  | + | 111.15  | 48.4217 | -2.29546 | 0           | chr19:43486039-43498446   |
| RBM3      |   | 110.887 | 63.4101 | -1.74873 | 0.000385613 | chrX:48317779-48321748    |
| ITGB5     |   | 108.699 | 59.2342 | -1.83507 | 0.000170556 | chr3:125964484-126088834  |
| ADIPOR1   | + | 107.962 | 66.8477 | -1.61504 | 0.00206937  | chr1:201176583-201194323  |
| CTNNB1    | + | 105.613 | 173.743 | 1.64509  | 5.53E-05    | chr3:41215945-41256943    |
| UBE2T     | + | 105.121 | 67.4103 | -1.55942 | 0.00440647  | chr1:200567408-200577717  |
| LASS2     | + | 104.532 | 161.113 | 1.54128  | 0.00057195  | chr1:149204272-149214064  |
| CS        |   | 104.091 | 161.047 | 1.54718  | 0.000520046 | chr12:54951749-54980442   |
| C20orf199 |   | 102.885 | 128.036 | 1.24446  | 0.00283344  | chr20:47295845-47339202   |
| TMEM147   |   | 99.2532 | 160.971 | 1.62182  | 0.000151308 | chr19:40728384-40730268   |
| TMEM59    |   | 98.8622 | 162.825 | 1.64699  | 9.10E-05    | chr1:54269936-54291699    |
| GABARAPL1 | + | 98.8065 | 172.888 | 1.74976  | 9.15E-06    | chr12:10256755-10266991   |
| TPX2      |   | 98.4896 | 55.8945 | -1.76206 | 0.000717693 | chr20:29790564-29853264   |
| PPIF      |   | 96.5749 | 160.304 | 1.65989  | 8.35E-05    | chr10:80777225-80785095   |
| AKR1B1    |   | 96.5109 | 197.005 | 2.04127  | 9.29E-09    | chr7:133777646-133794428  |
| LITAF     |   | 95.8435 | 151.113 | 1.57666  | 0.000488827 | chr16:11549082-11588823   |
| RNASEH2A  |   | 95.5401 | 48.3685 | -1.97525 | 0.000114639 | chr19:12778427-12785462   |
| WBP11     |   | 95.4644 | 56.026  | -1.70393 | 0.00154206  | chr12:14830678-14847668   |
| BAG1      |   | 95.0599 | 128.435 | 1.3511   | 0.000411526 | chr9:33209069-33501047    |
| ADAM9     |   | 94.2488 | 37.0207 | -2.54584 | 1.45E-06    | chr8:38973661-39081936    |
| GSTM3     |   | 93.7458 | 42.9839 | -2.18095 | 2.30E-05    | chr1:110078076-110085183  |
| CDK2AP1   |   | 93.3409 | 55.2333 | -1.68994 | 0.00199624  | chr12:122311492-122322640 |
| EID1      |   | 91.1688 | 154.638 | 1.69617  | 6.01E-05    | chr15:46903226-47042933   |
| IMPDH2    |   | 91.0115 | 50.3116 | -1.80896 | 0.0007408   | chr3:49036765-49041879    |
| MAZ       |   | 90.1238 | 54.7056 | -1.64743 | 0.00359638  | chr16:29725355-29730005   |
| KIAA0100  | + | 89.8762 | 134.494 | 1.49644  | 0.00309037  | chr17:23965584-23996300   |
| UGP2      |   | 87.7553 | 32.9111 | -2.66643 | 1.60E-06    | chr2:63921601-63972200    |
| C19orf10  |   | 87.3189 | 39.1076 | -2.23279 | 2.98E-05    | chr19:4608556-4621415     |
| SEC13     |   | 86.9742 | 44.091  | -1.97261 | 0.000238159 | chr3:10317614-10337858    |
| BZW1      |   | 86.1074 | 163.471 | 1.89845  | 3.00E-08    | chr2:201384891-201396805  |
| PSIP1     | + | 85.9316 | 51.1011 | -1.6816  | 0.00340465  | chr9:15454064-15501003    |
| CPA4      |   | 85.1551 | 250.81  | 2.94533  | 0           | chr7:129720209-129751255  |
| VCL       |   | 84.9801 | 20.7938 | -4.0868  | 8.72E-09    | chr10:75427877-75549920   |
| TOP2A     |   | 83.1094 | 49.8408 | -1.6675  | 0.00431588  | chr17:35798321-35827695   |
| GALNT2    |   | 83.1042 | 264.266 | 3.17994  | 0           | chr1:228269578-228484498  |
| ITM2B     |   | 81.4877 | 126.546 | 1.55295  | 0.00194256  | chr13:47705274-47734233   |
| MCAM      | + | 81.0242 | 155.128 | 1.91459  | 2.15E-06    | chr11:118684443-118693050 |
| SNX2      |   | 80.7277 | 130.759 | 1.61975  | 0.000656259 | chr5:122138648-122193701  |

|          |   |         |         |          |             |                           |
|----------|---|---------|---------|----------|-------------|---------------------------|
| EIF5B    | + | 80.3231 | 37.1475 | -2.16227 | 0.000101677 | chr2:99320265-99383160    |
| IFITM1   |   | 79.9484 | 235.693 | 2.94806  | 0           | chr11:303990-305272       |
| LXN      |   | 79.2776 | 40.7719 | -1.94442 | 2.76E-10    | chr3:159845010-159893054  |
| C19orf28 |   | 79.0613 | 135.413 | 1.71276  | 0.000116645 | chr19:3489262-3508571     |
| VAT1     |   | 78.3046 | 135.974 | 1.73648  | 0.00010022  | chr17:38420147-38427985   |
| CUL4A    |   | 76.3783 | 118.659 | 1.55357  | 0.00267249  | chr13:112911086-112967393 |
| TAF10    | + | 75.1144 | 40.2543 | -1.866   | 6.85E-12    | chr11:6581539-6590021     |
| CD59     |   | 72.7482 | 118.198 | 1.62475  | 0.00112573  | chr11:33681131-33714601   |
| CREG1    |   | 72.596  | 112.244 | 1.54615  | 0.00381191  | chr1:165776874-165789680  |
| SERPINB5 |   | 72.0739 | 123.307 | 1.71084  | 0.000292741 | chr18:59295123-59323298   |
| WDR34    | + | 71.6006 | 51.8272 | -1.38153 | 3.22E-07    | chr9:130354686-130458950  |
| GSR      |   | 69.6607 | 36.2617 | -1.92105 | 0.00143132  | chr8:30655976-30704985    |
| INPPL1   |   | 69.2457 | 125.663 | 1.81474  | 6.84E-05    | chr11:71613529-71632868   |
| TGFBR1   | + | 68.4929 | 164.316 | 2.39902  | 1.17E-09    | chr9:100907232-100956294  |
| CHTF8    |   | 66.0538 | 32.9347 | -2.0056  | 0.000931795 | chr16:67697660-67723985   |
| ENO3     |   | 65.1649 | 23.4806 | -2.77527 | 2.23E-05    | chr17:4795130-4801148     |
| MGAT4B   |   | 64.5175 | 99.976  | 1.5496   | 1.37E-08    | chr5:179157204-179218446  |
| PLAC8    |   | 64.3183 | 34.9234 | -1.8417  | 0.00380109  | chr4:84230234-84254935    |
| AIMP2    |   | 61.9627 | 45.056  | -1.37524 | 9.70E-06    | chr7:6015407-6065386      |
| ACSL4    |   | 61.8122 | 30.4337 | -2.03104 | 0.00137657  | chrX:108771219-108863277  |
| OSMR     | + | 61.2465 | 136.918 | 2.23552  | 1.67E-07    | chr5:38881892-38970159    |
| DPH5     | + | 61.1415 | 27.7375 | -2.20429 | 0.000555182 | chr1:101227768-101263950  |
| SDF4     |   | 61.0433 | 103.459 | 1.69485  | 0.00107957  | chr1:1142150-1157310      |
| SLC39A6  |   | 60.9557 | 143.498 | 2.35414  | 2.72E-08    | chr18:31942491-31963355   |
| CCNG1    |   | 59.5776 | 133.896 | 2.24742  | 2.01E-07    | chr5:162797154-162804600  |
| FAM127A  |   | 58.3637 | 95.9345 | 1.64374  | 0.00275607  | chrX:133993998-133995241  |
| PCSK9    |   | 57.9063 | 27.754  | -2.08641 | 0.00144467  | chr1:55277807-55303111    |
| ACAT2    |   | 57.2357 | 43.6153 | -1.31228 | 0.00304108  | chr6:160102978-160130725  |
| NUP210   |   | 56.2593 | 27.8854 | -2.01752 | 0.00244081  | chr3:13332736-13436809    |
| SUPT16H  |   | 55.8378 | 28.4818 | -1.96047 | 0.00345997  | chr14:20889471-20922265   |
| TMEM2    | + | 55.558  | 108.087 | 1.94548  | 5.54E-05    | chr9:73488101-73573620    |
| NMRAL1   | + | 55.5213 | 20.6061 | -2.69441 | 3.55E-13    | chr16:4451695-4500349     |
| PDE2A    |   | 55.3447 | 117.378 | 2.12085  | 4.01E-06    | chr11:71964833-72063142   |
| C6orf176 |   | 54.9793 | 96.3171 | 1.75188  | 0.000877378 | chr6:166257525-166323093  |
| RGS2     | + | 54.8423 | 140.469 | 2.56133  | 3.49E-09    | chr1:191044791-191048029  |
| DUSP16   | + | 54.8157 | 91.026  | 1.66058  | 0.00301194  | chr12:12520097-12606584   |
| SUMO1    |   | 54.5937 | 15.0985 | -3.61584 | 9.94E-06    | chr2:202779147-202811567  |
| TAF6     |   | 53.9202 | 28.6359 | -1.88296 | 4.08E-09    | chr7:99528339-99554915    |
| HIBADH   |   | 53.2536 | 24.1791 | -2.20246 | 0.00128283  | chr7:27531585-27669127    |
| CEP55    |   | 52.4588 | 25.6568 | -2.04464 | 0.00299841  | chr10:95246358-95278839   |
| WARS     | + | 51.9951 | 110.668 | 2.12843  | 7.14E-06    | chr14:99869877-99912433   |
| NNMT     |   | 51.9196 | 115.132 | 2.21751  | 1.90E-06    | chr11:113671744-113688448 |
| SERINC3  |   | 51.0097 | 85.0008 | 1.66637  | 0.00410761  | chr20:42558277-42584140   |
| SLC20A1  | + | 50.5805 | 92.2513 | 1.82385  | 0.000592955 | chr2:113119997-113137871  |
| ALDH3B1  |   | 50.1812 | 22.8196 | -2.19904 | 0.00181032  | chr11:67532623-67553319   |
| TM7SF3   | + | 49.7401 | 123.522 | 2.48335  | 6.07E-08    | chr12:27015774-27058606   |
| RECQL    |   | 48.8933 | 26.4788 | -1.84651 | 0.00299045  | chr12:21481804-21545870   |
| SLC12A3  |   | 48.5445 | 13.3464 | -3.63727 | 2.94E-05    | chr16:55456619-55507263   |
| TWF1     |   | 47.7225 | 21.7257 | -2.19659 | 0.00236201  | chr12:42473792-42486445   |
| DDAH1    | + | 47.6282 | 87.4272 | 1.83562  | 0.000744696 | chr1:85556756-85816634    |
| CDKN1A   |   | 47.5873 | 223.052 | 4.68722  | 0           | chr6:36754436-36763087    |

|           |   |         |         |          |             |                           |
|-----------|---|---------|---------|----------|-------------|---------------------------|
| CPNE1     |   | 46.0701 | 84.5303 | 1.83482  | 2.59E-06    | chr20:33677379-33716262   |
| DAB2      | + | 45.9759 | 87.5991 | 1.90533  | 0.000400434 | chr5:39407536-39461092    |
| ORMDL2    |   | 45.5432 | 27.0253 | -1.68521 | 0.00138497  | chr12:54498072-54509687   |
| GDA       |   | 44.5292 | 78.5331 | 1.76363  | 0.00249032  | chr9:73954112-74056960    |
| TLCD1     | + | 44.3445 | 26.4232 | -1.67824 | 1.69E-08    | chr17:24071126-24078076   |
| CALD1     |   | 43.9971 | 15.6236 | -2.81607 | 0.000441386 | chr7:134114703-134306019  |
| ANKRD52   | + | 43.9409 | 79.0264 | 1.79847  | 0.00181459  | chr12:54910086-54938410   |
| LYPD3     | + | 42.5219 | 73.9633 | 1.73942  | 0.00402359  | chr19:48656785-48661671   |
| ITFG3     |   | 42.3167 | 18.1372 | -2.33314 | 0.00253842  | chr16:224801-256119       |
| EPHX1     |   | 42.0285 | 87.8987 | 2.09141  | 3.88E-07    | chr1:224064419-224136671  |
| SERPINE2  | + | 41.7538 | 85.9276 | 2.05796  | 0.00013048  | chr2:224548008-224612280  |
| C1QTNF6   |   | 41.7514 | 106.882 | 2.55996  | 2.72E-07    | chr22:35906151-35914276   |
| STRA6     | + | 41.6114 | 18.252  | -2.27983 | 0.00334441  | chr15:72258862-72288424   |
| DARS2     | + | 40.6674 | 19.7801 | -2.05598 | 0.00160188  | chr1:172035310-172094305  |
| PPP2R1B   |   | 40.6551 | 99.7106 | 2.4526   | 5.83E-11    | chr11:110978379-111142379 |
| PLK2      | + | 39.7453 | 79.6388 | 2.00373  | 0.00034534  | chr5:57785566-57791670    |
| PHLDA3    |   | 39.4351 | 87.2682 | 2.21296  | 3.48E-05    | chr1:199701244-199704922  |
| DPP7      | + | 39.2716 | 70.104  | 1.78511  | 0.00364576  | chr9:139124812-139129016  |
| FBLN2     |   | 39.0498 | 16.5137 | -2.36469 | 0.00336794  | chr3:13565624-13654923    |
| LSMD1     |   | 38.4845 | 24.9111 | -1.54487 | 0.00242442  | chr17:7700727-7706325     |
| RPL18AP3  |   | 37.3588 | 73.0774 | 1.9561   | 5.43E-05    | chr19:17831726-17835124   |
| RASSF8    |   | 37.2068 | 67.6568 | 1.8184   | 0.00340213  | chr12:26003230-26124091   |
| PIK3R2    | + | 34.6606 | 77.0857 | 2.22402  | 9.29E-05    | chr19:18125015-18142343   |
| BZW1L1    |   | 32.7759 | 68.371  | 2.08601  | 1.55E-11    | chr2:201384891-201396805  |
| ERCC1     | + | 32.4645 | 17.7627 | -1.82768 | 0.00164414  | chr19:50574732-50619017   |
| IGFBP3    | + | 31.9295 | 71.2642 | 2.23192  | 0.000163242 | chr7:45918368-45927396    |
| STAT3     | + | 31.9061 | 61.7416 | 1.9351   | 0.00246729  | chr17:37718868-37794039   |
| EPAS1     | + | 31.2381 | 87.672  | 2.80657  | 7.33E-07    | chr2:46378044-46467346    |
| C3        | + | 29.2586 | 72.041  | 2.46222  | 3.95E-05    | chr19:6628845-6671662     |
| DUSP3     |   | 28.8184 | 56.3714 | 1.95609  | 0.0033902   | chr17:39199014-39211894   |
| LRFN4     |   | 28.0421 | 43.0792 | 1.53623  | 0.00184424  | chr11:66372572-66482423   |
| KDELR3    |   | 27.2026 | 10.6988 | -2.54258 | 0           | chr22:37194028-37232291   |
| SYNC      |   | 26.7377 | 4.93784 | -5.41486 | 0           | chr1:32889335-32940948    |
| SAMD11    |   | 26.1827 | 15.6739 | -1.67046 | 0.00134136  | chr1:850983-884542        |
| CUTC      |   | 24.5774 | 14.6735 | -1.67495 | 5.58E-06    | chr10:101409252-101505884 |
| VWA5A     |   | 23.9336 | 67.0193 | 2.80022  | 1.61E-05    | chr11:123491320-123522828 |
| SCARNA12  |   | 22.9644 | 17.3226 | -1.32569 | 1.28E-13    | chr12:6944777-6950177     |
| SUMO1P3   |   | 22.4883 | 4.87028 | -4.61746 | 0           | chr1:158525000-158595366  |
| RAVER2    | + | 22.3907 | 37.2057 | 1.66166  | 3.13E-09    | chr1:64983365-65204775    |
| GDF15     | + | 22.1827 | 240.699 | 10.8508  | 0           | chr19:18357967-18360986   |
| PEG10     |   | 21.8543 | 46.3892 | 2.12266  | 0.00371946  | chr7:94123572-94136942    |
| SAT2      | + | 21.4619 | 33.9234 | 1.58063  | 0.000129845 | chr17:7435271-7477425     |
| TGFB3     |   | 20.9234 | 54.1558 | 2.58829  | 0.000220305 | chr1:91918489-92124375    |
| C1S       | + | 20.7275 | 47.8957 | 2.31073  | 0.00144645  | chr12:7038240-7048594     |
| ACOT13    |   | 19.8932 | 8.1734  | -2.4339  | 8.81E-06    | chr6:24775241-24827382    |
| ADCY3     |   | 19.2447 | 6.78757 | -2.83529 | 0.00400527  | chr2:24869836-24995559    |
| POLG      | + | 19.0758 | 44.8    | 2.34853  | 7.92E-09    | chr15:87588197-87679030   |
| NR1H3     | + | 18.8129 | 9.23537 | -2.03705 | 0.00106626  | chr11:47217428-47246977   |
| XPR1      |   | 18.5026 | 41.5556 | 2.24593  | 0.00379084  | chr1:178867768-179126036  |
| FAS       | + | 18.4876 | 45.5618 | 2.46445  | 0.00103333  | chr10:90684812-90765522   |
| HNRPA1L-2 |   | 18.3169 | 2.30226 | -7.95605 | 0           | chr12:52960754-52965297   |

|                  |          |                |                |                 |                    |                                 |
|------------------|----------|----------------|----------------|-----------------|--------------------|---------------------------------|
| LOC1002707<br>10 |          | 17.764         | 25.3435        | 1.42668         | 0.0019143          | chr10:99463470-99467895         |
| CFI              |          | 17.7457        | 47.8752        | 2.69785         | 0.000355605        | chr4:110881296-110942784        |
| <b>HDHC3</b>     | <b>+</b> | <b>16.9076</b> | <b>11.5681</b> | <b>-1.46157</b> | <b>0.00115782</b>  | <b>chr15:89274413-89298327</b>  |
| <b>CCDC18</b>    | <b>+</b> | <b>16.0444</b> | <b>8.65494</b> | <b>-1.85379</b> | <b>0.00189955</b>  | <b>chr1:93389996-93516856</b>   |
| CTU2             |          | 15.9992        | 13.5779        | -1.17833        | 0.00125302         | chr16:87300391-87378873         |
| KRT17            |          | 15.278         | 97.9417        | 6.41064         | 1.43E-11           | chr17:37029217-37034408         |
| GBA2             |          | 14.373         | 35.346         | 2.45919         | 0                  | chr9:35687333-35742871          |
| CHAC2            |          | 14.3552        | 8.53411        | -1.6821         | 0.000100251        | chr2:53750621-53940674          |
| TRIM14           |          | 13.995         | 33.4725        | 2.39175         | 0.000102236        | chr9:99858779-99921309          |
| NME7             |          | 13.8901        | 27.1006        | 1.95107         | 4.44E-16           | chr1:167342570-167603810        |
| PBXIP1           |          | 13.6996        | 33.9256        | 2.47639         | 0.00461449         | chr1:153183179-153195191        |
| HTRA2            |          | 13.4761        | 7.66007        | -1.75927        | 0.000741462        | chr2:74607282-74634570          |
| FAM120AOS        |          | 12.6614        | 7.08997        | -1.78582        | 7.44E-08           | chr9:95248602-95368218          |
| SMAGP            |          | 12.4986        | 31.3078        | 2.5049          | 0                  | chr12:49918774-49950469         |
| ATF5             |          | 12.4888        | 22.22          | 1.77919         | 0.000848645        | chr19:55084722-55129004         |
| <b>MMACHC</b>    | <b>+</b> | <b>12.2308</b> | <b>6.6743</b>  | <b>-1.83252</b> | <b>1.54E-12</b>    | <b>chr1:45738442-45760196</b>   |
| C16orf53         |          | 12.0514        | 3.96318        | -3.04084        | 4.85E-05           | chr16:29735028-29766842         |
| PPAP2A           |          | 11.9033        | 18.9682        | 1.59352         | 0.000366191        | chr5:54639332-54866630          |
| KDELC1           |          | 10.6857        | 22.4204        | 2.09817         | 0.000775213        | chr13:102234631-102291888       |
| <b>TMEM183A</b>  | <b>+</b> | <b>10.0768</b> | <b>23.5762</b> | <b>2.33965</b>  | <b>0.000312304</b> | <b>chr1:201243156-201259820</b> |
| DDIT3            |          | 10.0762        | 14.6834        | 1.45724         | 2.39E-05           | chr12:56168117-56200567         |
| PLEKHA9          |          | 9.68312        | 5.31114        | -1.82317        | 1.45E-05           | chr12:43853113-44120454         |
| TSPAN31          |          | 9.58298        | 5.06361        | -1.89252        | 1.05E-05           | chr12:56425050-56432431         |
| <b>CREB3L4</b>   | <b>+</b> | <b>7.22463</b> | <b>4.13405</b> | <b>-1.74759</b> | <b>5.09E-07</b>    | <b>chr1:152207020-152217075</b> |
| HCCA2            |          | 5.91069        | 8.69964        | 1.47185         | 2.05E-06           | chr11:1447268-1742077           |
| LOC1003026<br>52 |          | 5.6682         | 9.91736        | 1.74965         | 0.000920715        | chr2:53750621-53940674          |
| MXD3             |          | 5.56056        | 2.26063        | -2.45974        | 7.79E-08           | chr5:176663440-176671898        |
| FAM158A          |          | 5.36166        | 3.54           | -1.51459        | 0.00451339         | chr14:23675217-23680637         |
| PIH1D2           |          | 5.27113        | 0.500478       | -10.5322        | 0                  | chr11:111400747-111450105       |
| YY2              |          | 5.26432        | 9.02292        | 1.71398         | 2.41E-05           | chrX:21767576-21813461          |
| <b>LENG9</b>     | <b>+</b> | <b>5.12877</b> | <b>2.53373</b> | <b>-2.0242</b>  | <b>2.10E-05</b>    | <b>chr19:59651876-59666706</b>  |
| FTHL3P           |          | 4.68882        | 8.02649        | 1.71184         | 1.32E-08           | chr2:27457564-27486000          |
| EIF3CL_dup2      |          | 3.84277        | 7.44152        | 1.9365          | 1.42E-05           | chr16:28630282-28654554         |
| CCDC24           |          | 3.19833        | 1.86549        | -1.71447        | 0.00273831         | chr1:44229866-44269721          |
| C5orf45          |          | 3.1876         | 5.25934        | 1.64994         | 0                  | chr5:179157204-179218446        |
| SUGT1P           |          | 3.12756        | 8.63422        | 2.76069         | 0                  | chr9:33209069-33501047          |
| DUSP8            |          | 3.08337        | 6.63625        | 2.15227         | 1.23E-07           | chr11:1447268-1742077           |
| C18orf56         |          | 2.93561        | 5.53287        | 1.88474         | 0                  | chr18:586997-702662             |
| EFCAB5           |          | 2.82826        | 0.95332        | -2.96675        | 0.00325526         | chr17:24977090-25459595         |
| IQCG             |          | 2.6985         | 1.27731        | -2.11264        | 3.39E-12           | chr3:199100343-199171283        |
| RPL23AP64        |          | 2.34397        | 3.83666        | 1.63682         | 1.11E-09           | chr11:118374061-118394267       |
| DNASE1           |          | 2.26202        | 3.65263        | 1.61476         | 5.07E-05           | chr16:3642940-3707599           |
| PPAN-<br>P2RY11  |          | 2.18561        | 0.816961       | -2.67529        | 1.99E-08           | chr19:10077964-10091599         |
| GPR75            |          | 2.16913        | 3.67753        | 1.69539         | 0.00229248         | chr2:53750621-53940674          |
| PART1            |          | 2.07086        | 4.20706        | 2.03155         | 3.72E-06           | chr5:58300622-59879241          |
| TYRO3P           |          | 1.91505        | 3.98377        | 2.08024         | 3.33E-15           | chr15:74295683-74390865         |
| <b>C1orf182</b>  | <b>+</b> | <b>1.87327</b> | <b>2.14174</b> | <b>1.14332</b>  | <b>0.000388905</b> | <b>chr1:154545375-154583409</b> |
| PLTP             |          | 1.82496        | 0              | -18249.6        | 0                  | chr20:43950673-43974193         |
| INE1             |          | 1.47898        | 3.00734        | 2.03339         | 0                  | chrX:46935142-46959471          |



| LNP1      | + | 1.18628  | 0.547498 | -2.16673 | 6.52E-07   | chr3:101564996-101657860 |
|-----------|---|----------|----------|----------|------------|--------------------------|
| DGCR11    |   | 1.00754  | 2.01666  | 2.00157  | 0.001946   | chr22:17403794-17489967  |
| TIAF1     |   | 0.989095 | 1.7083   | 1.72713  | 0.00309614 | chr17:24424653-24531533  |
| SLC15A3   |   | 0.827363 | 2.26874  | 2.74213  | 3.85E-07   | chr11:60448488-60475833  |
| HSN2      |   | 0.794177 | 2.17633  | 2.74036  | 0          | chr12:732485-890879      |
| CCDC152   |   | 0.756597 | 1.28685  | 1.70084  | 4.09E-05   | chr5:42792676-42847781   |
| LOC29034  |   | 0.542746 | 3.67656  | 6.774    | 0          | chr2:211050653-211252076 |
| PLAC4     |   | 0.147533 | 3.60753  | 24.4524  | 0          | chr21:41461597-41570394  |
| LOC338651 |   | 0        | 1.23633  | 12363.3  | 0          | chr11:1447268-1742077    |
| CCRL1     |   | 0        | 1.27969  | 12796.9  | 0          | chr3:133759671-133879634 |
| LPAR6     |   | 0        | 2.57967  | 25796.7  | 0          | chr13:47775883-47954027  |
| KRTAP5-1  |   | 0        | 2.67247  | 26724.7  | 0          | chr11:1447268-1742077    |
| SCARNA9   |   | 0        | 4.54132  | 45413.2  | 0          | chr11:93034463-93103170  |

The 357 genes with significantly changing RNA abundance following SUMO-1 depletion are shown. Whether a gene had SUMO-1 present at its promoter during G1 is indicated, and the average expression for cells transfected with the control siRNA or the SUMO-1 specific siRNA are shown. The genes are ordered according to the expression levels (high to low) in the control transfected cells.

**Supplementary Table S5. Comparison between Ubiquitin and SUMO-1 mark during M or G1 phase**

|       | Total peaks | Overlap w/ SUMO-1 (G1) (%) |
|-------|-------------|----------------------------|
| Ub-G1 | 7531        | 2816 (38%)                 |
| Ub-M  | 3446        | 1829 (53%)                 |

## Supplementary Table S6. Primers and siRNAs used in this paper.

### Primers for RT-qPCR

| Gene name (Refseq) | Sequence (5' to 3')                               |
|--------------------|---------------------------------------------------|
| RPL3               | TTCTCTGTGGCACGCGCTGG<br>CCAGCAAGGACTTGCGGAGGG     |
| RPL5               | GGCCCGCAGGCTTCTCAATAGG<br>GTGAAGGCACCTGGCTGACCA   |
| RPL7A              | ACGTGGATCCCATCGAGCTGGT<br>CCACCCCAGTGACGGCGGAT    |
| RPL10A             | TTAGCGCGGCGTGAGAAGCC<br>TCCAGGAACTTGCGGCGCTT      |
| RPL17              | GGTGATCTGTGAAAATGGTTTCGC<br>ATGCTGAATTTACTCCCGTGC |
| RPL23              | GGTGGGCGGGGCGTTAAAGT<br>CCCACCACGTCCTCGCTTCG      |
| RPL26              | AGCGGGAGCGGCCAAAATGA<br>TTCCCGCTGCACCCGTTCAA      |
| SLC1A3             | TGGCAAACCATTCACCCAACA<br>ACCGTGTCCGGGATTTGGGTCT   |
| Polr2a             | ATCTCTCCTGCCATGACACC<br>AGACCAGGCAGGGGAGTAAC      |

### Primers for ChIP-qPCR

| Gene name (Refseq) | Sequence (5' to 3')                                    |
|--------------------|--------------------------------------------------------|
| IL2                | TCTGCCTGCTTTCTGTGAAACTCAA<br>GGACAAGCCTCATCCCAAACCTCCA |
| EIF3F              | GTTTCTCTTCGAACGCCGT<br>GAGCACTGAAATAGTCCCGC            |
| RPS27              | CAGGATTTCCGCTTTCGCTC<br>ACAGAACAGCGAGATCTCCG           |
| RPL26              | GACCTATGTCTCTCGGAGCG<br>GTTTTGCAATCCCTCGCAGT           |
| RPL38              | TGATCCTCGGCAGGCACCGT<br>CAGCAAGCAGCAACCGGGGA           |
| RPL5               | CGTCACTGGCGTGACCGTCC<br>CTGCGGAACAGAGACCGGCG           |
| RPL7A              | CCGCCGCCCAAGATGGTGAG                                   |

|        |                      |
|--------|----------------------|
| RPL10A | GGCAGCGGATACAGCCGGAA |
|        | GGCGCTCAGGACTGCGACAA |
| RPL3   | GCTCCTCGGTCCTACCCGCA |
|        | CCTTCGGAGTGCACCAGCGG |
|        | TTGCTTTAGGGGCACGGGCG |
| RPL23  | AATCCGCCAGCCACTGCACG |
|        | TTGCTCCGGCCACGTGAGGA |

---

#### siRNAs

| Gene name | Sequence            |
|-----------|---------------------|
| SUMO-1    |                     |
| siRNA-1   | CAAAAAUCCCGAUGGCAC  |
|           | GUGCCAUCGGGAUUUUUUG |
| siRNA-2   | GGACAGGAUAGCAGUGAGA |
|           | UCUCACUGCUAUCCUGUCC |
| UBC9      | CUGGGAAUGGAGGAAGAAG |
|           | CUUCUCCUCCAUUCCAG   |

---

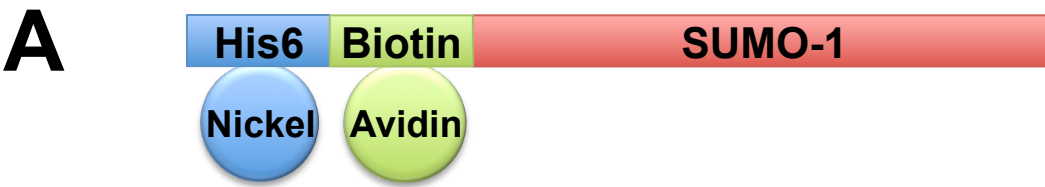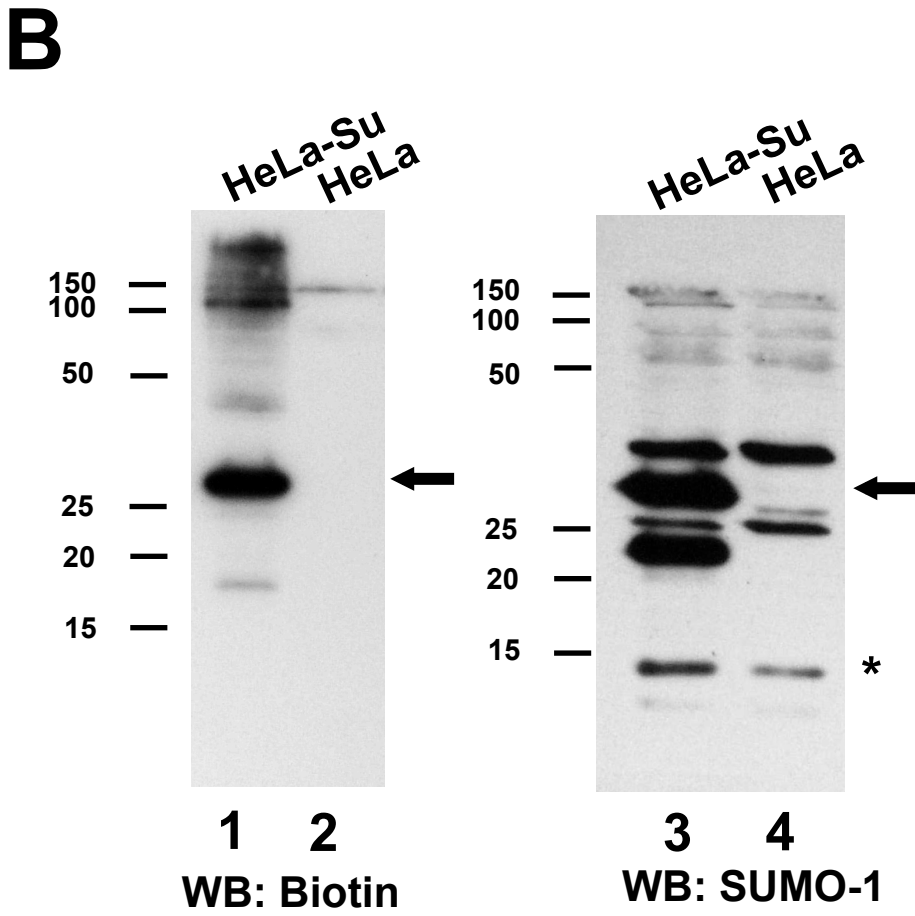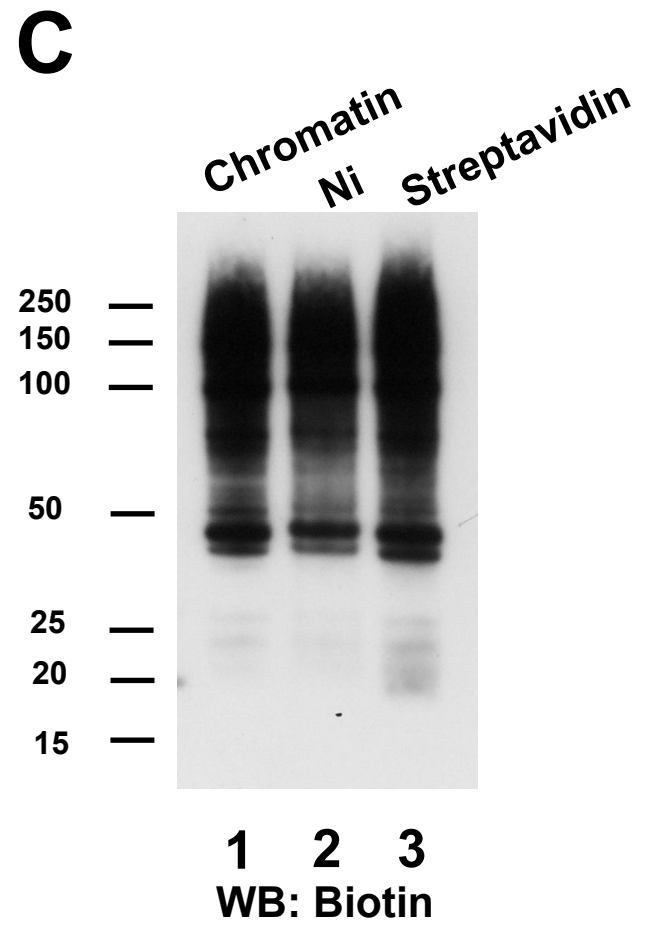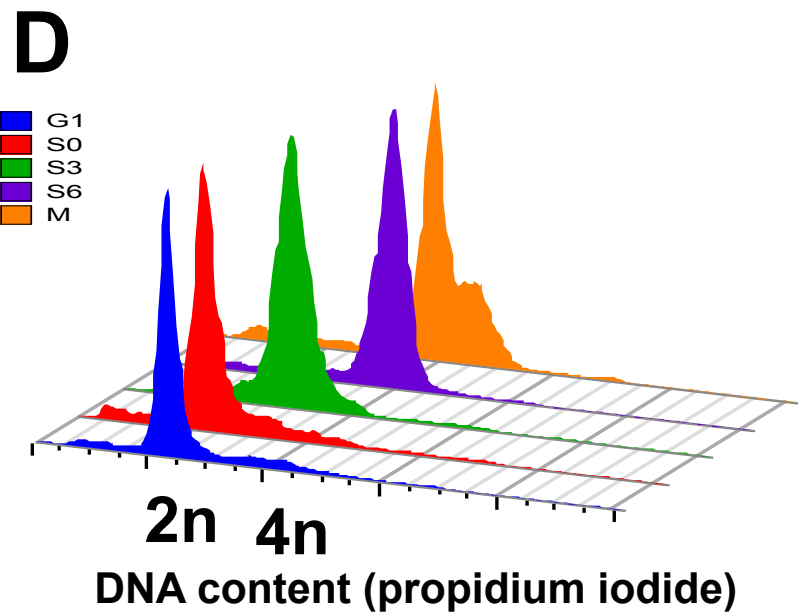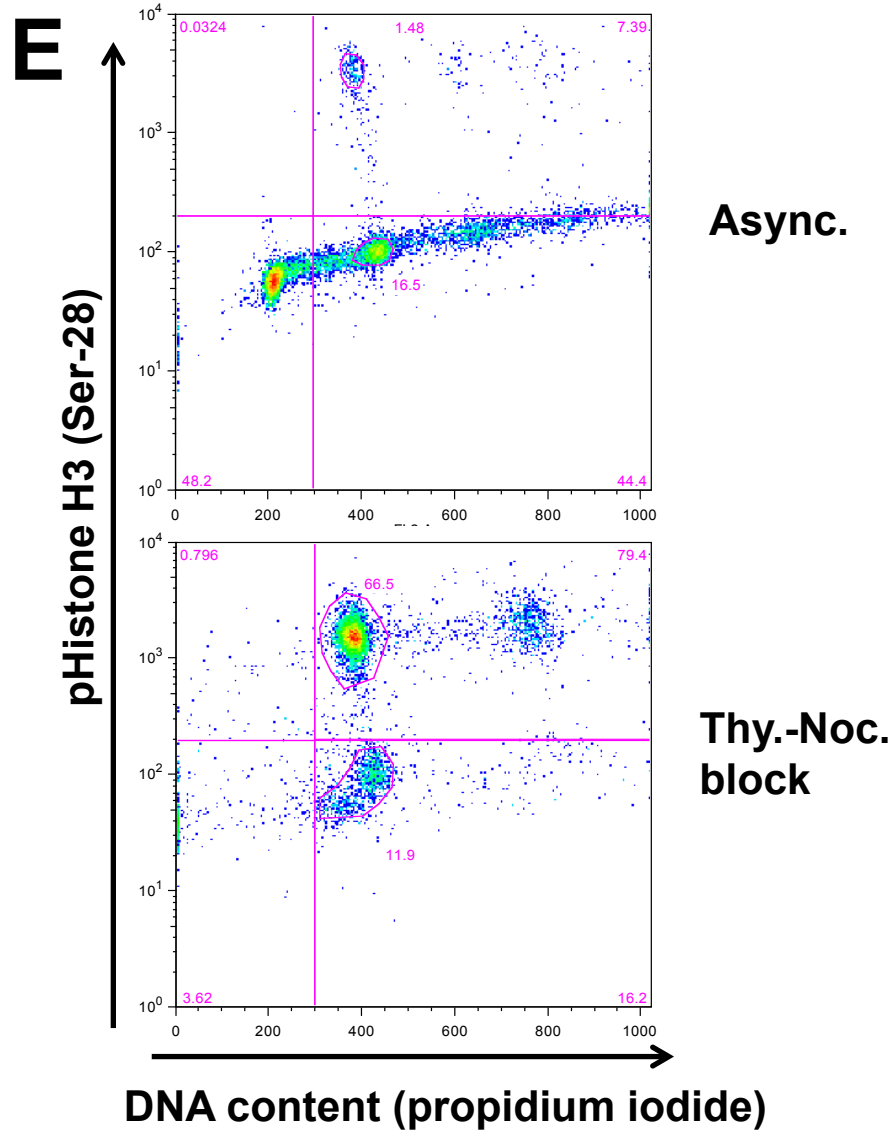

**A**

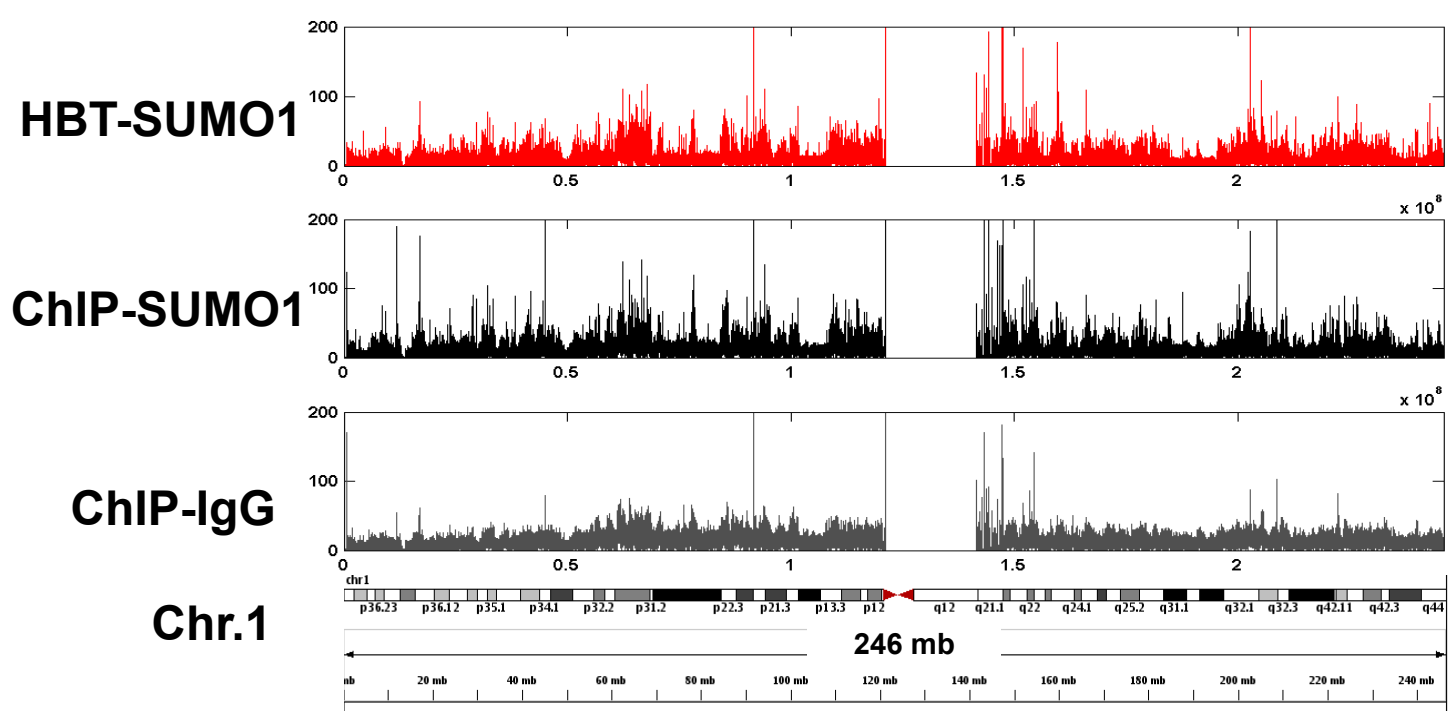

**B**

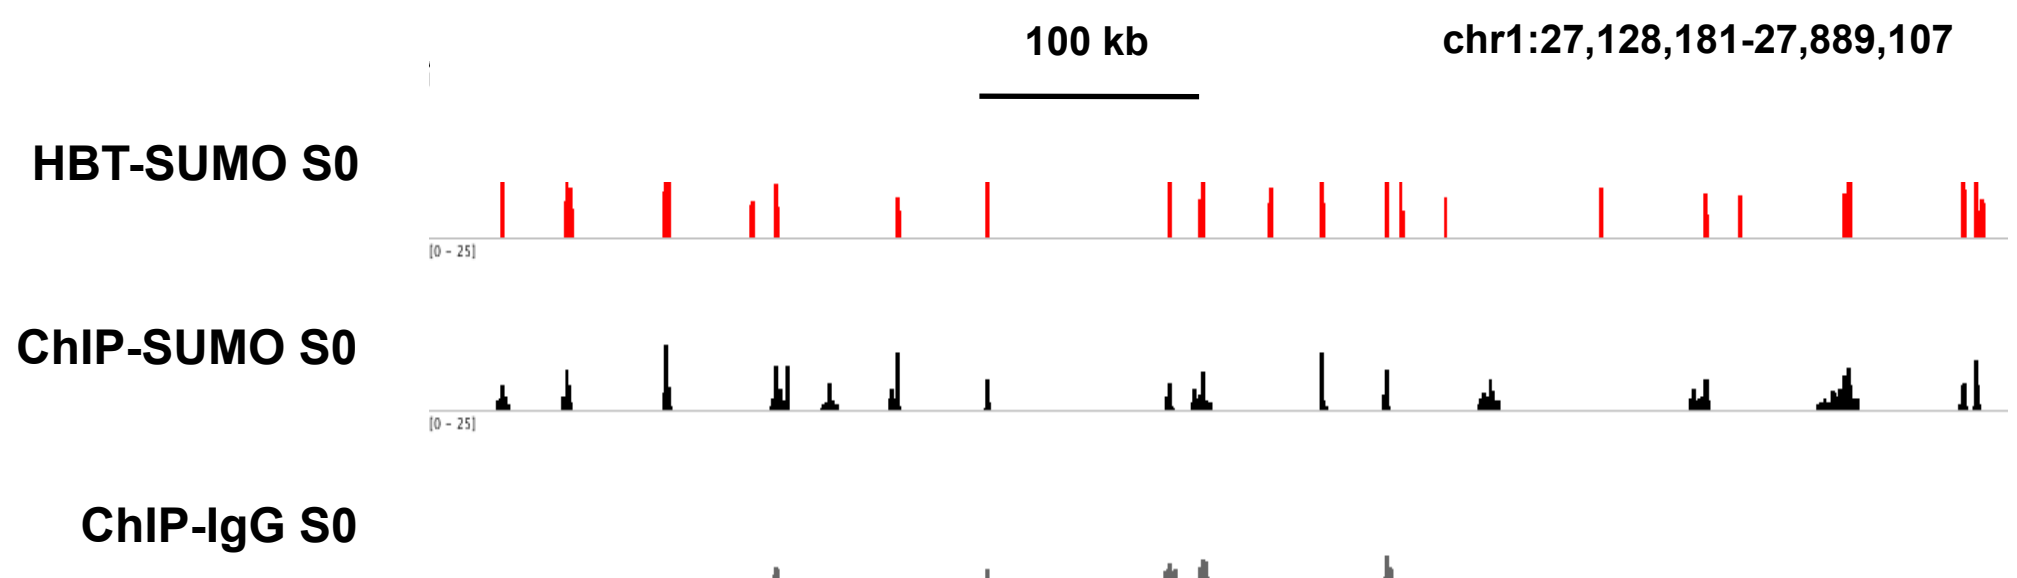

**C**

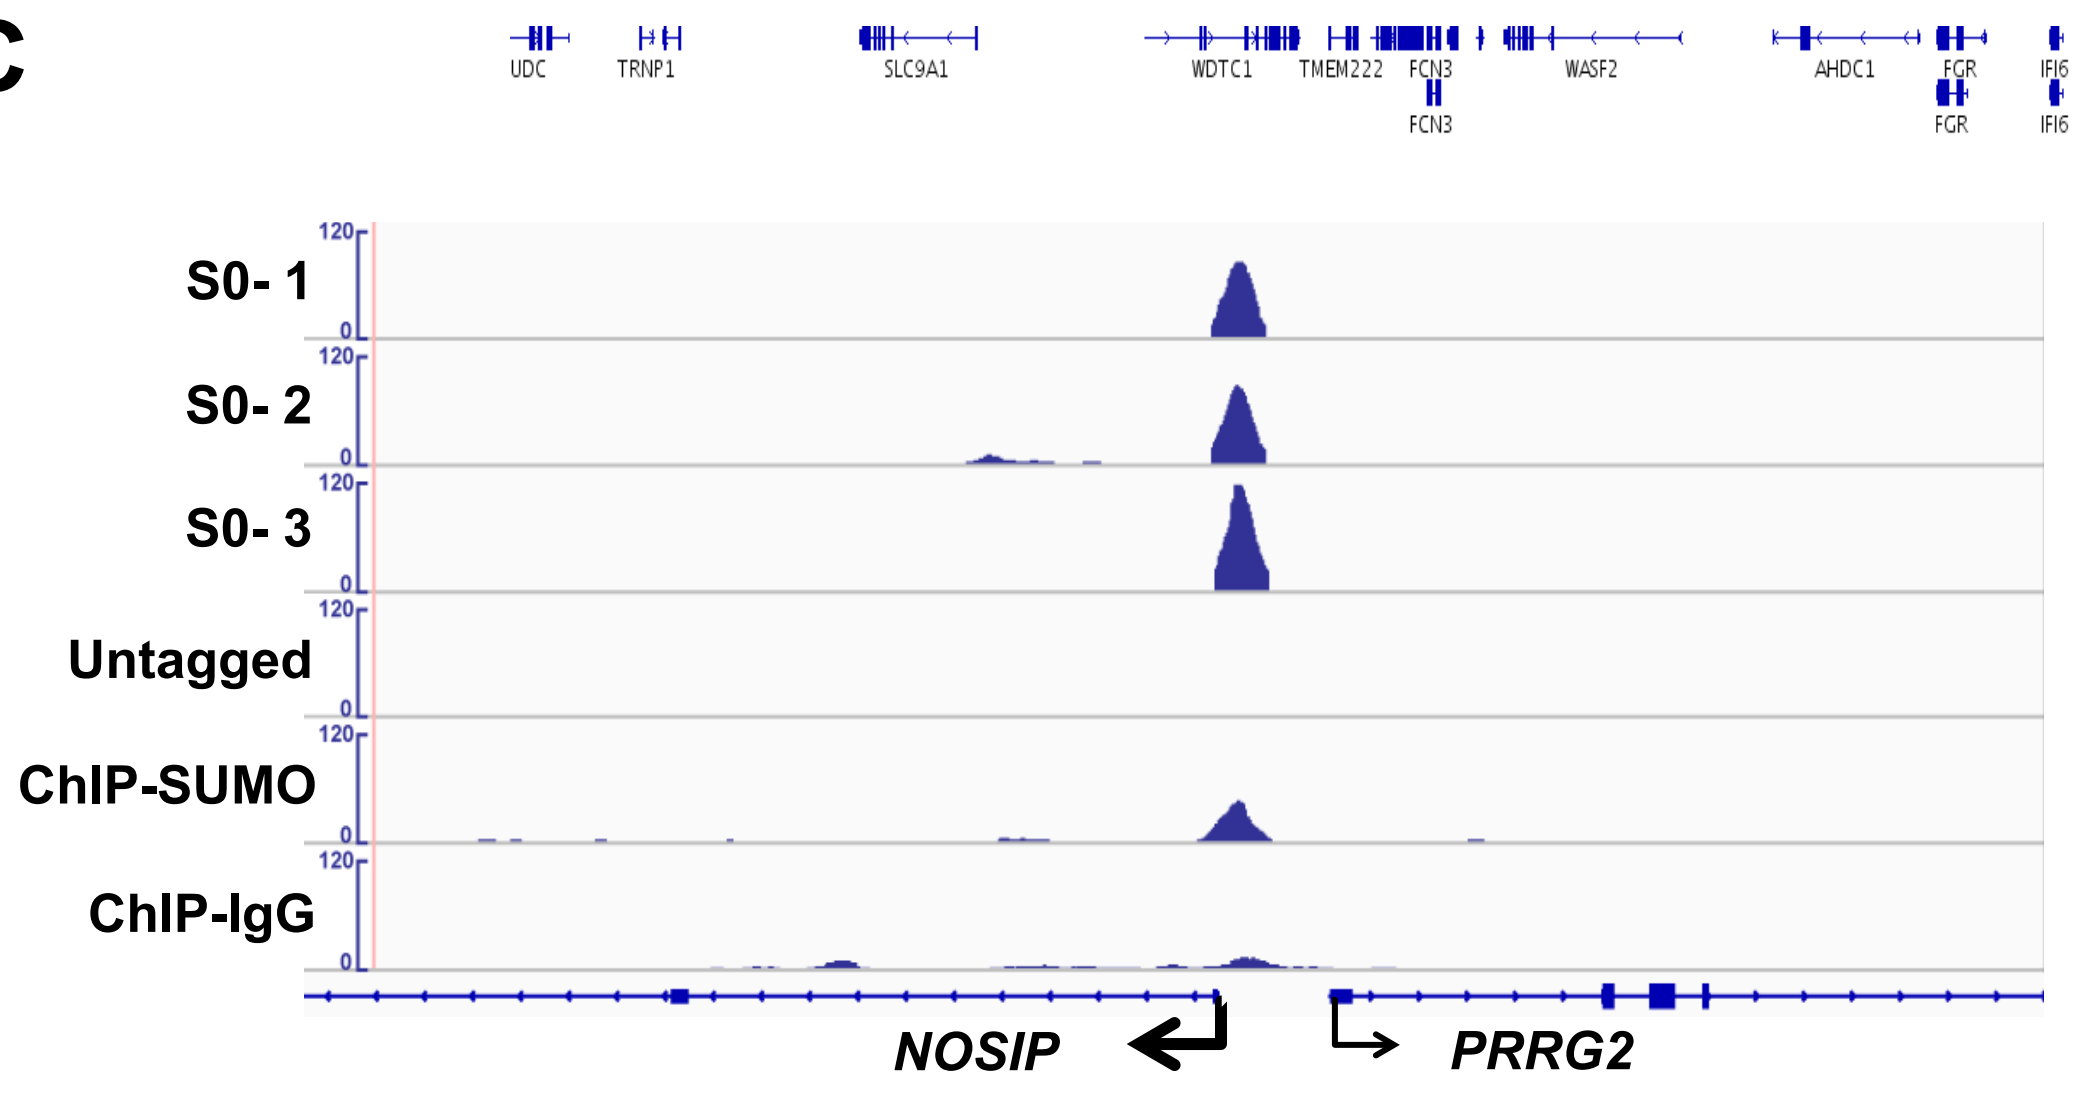

**D**

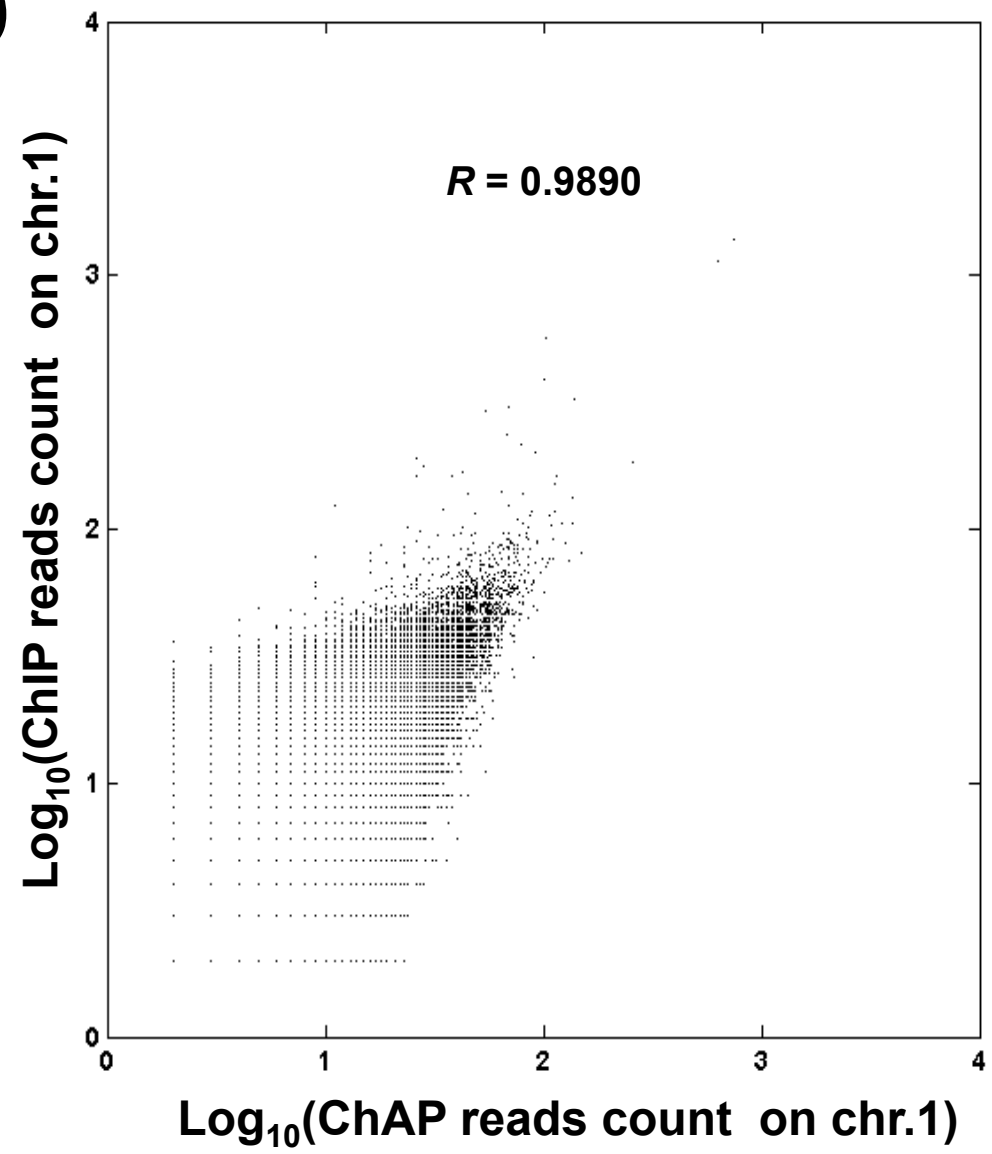

**A**

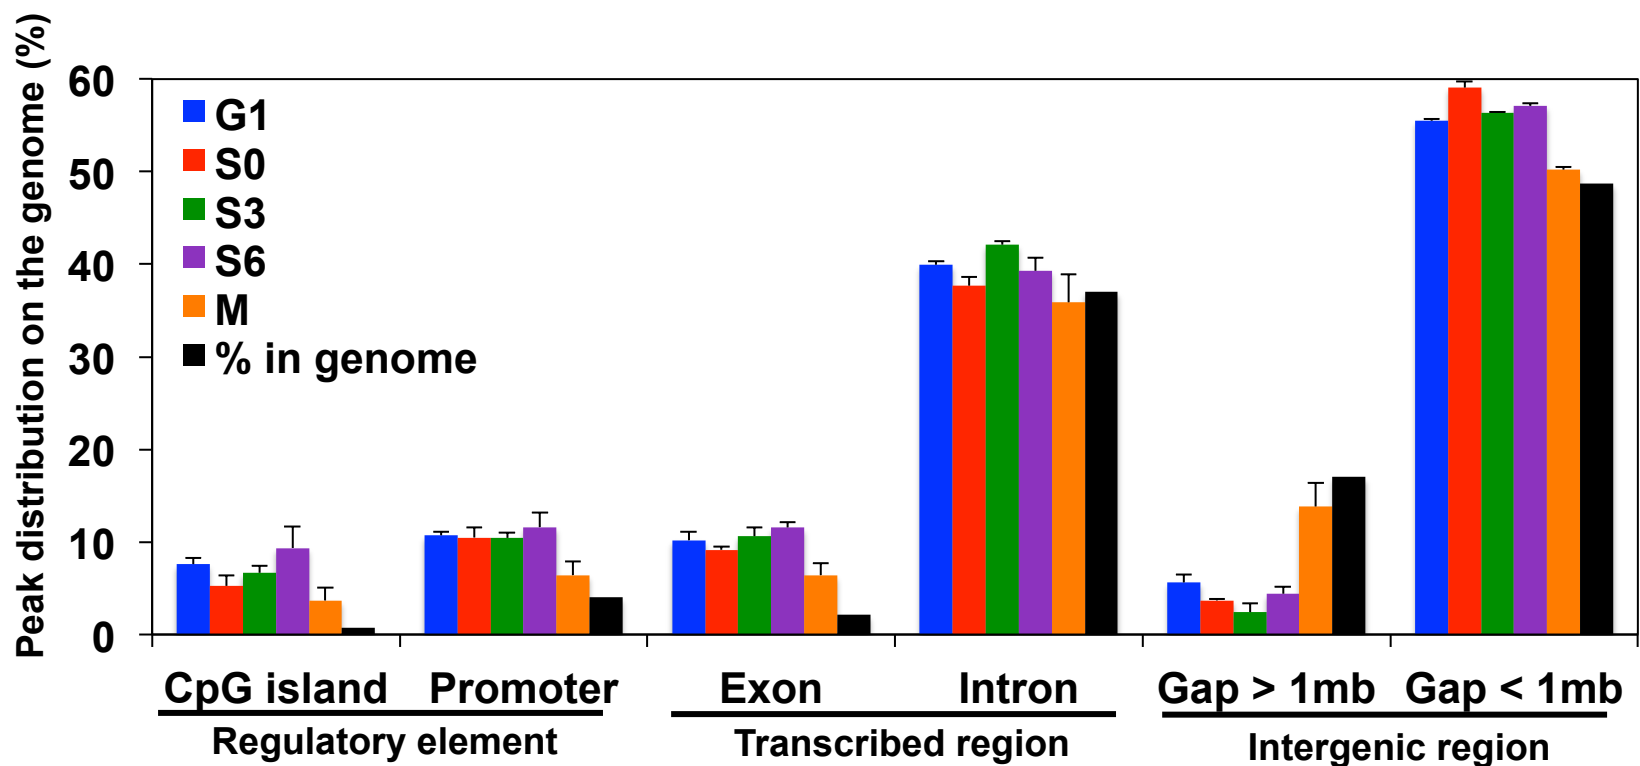

**B**

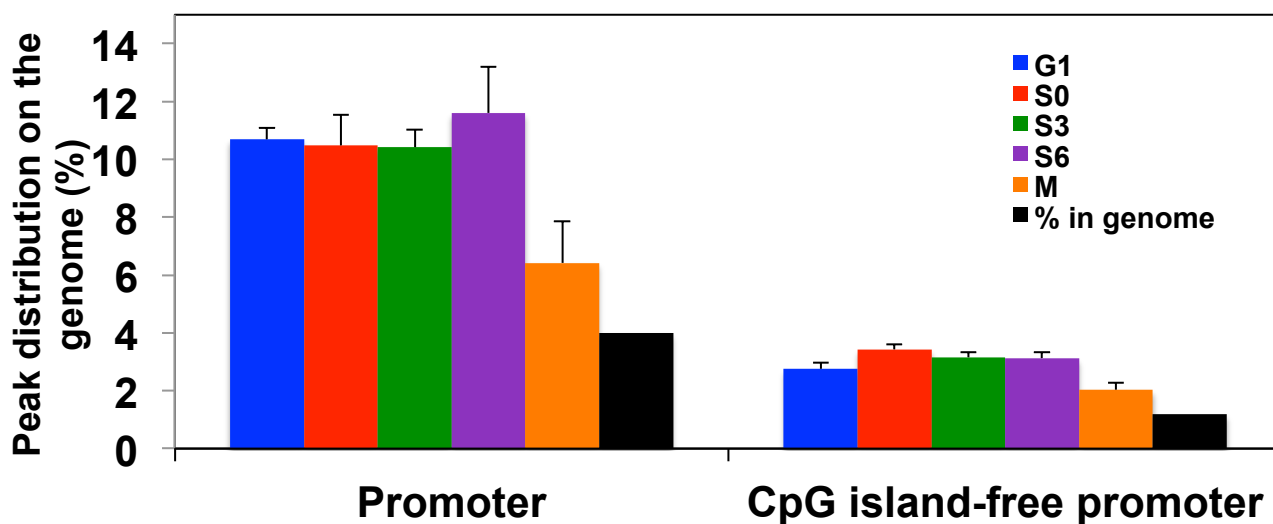

**C**

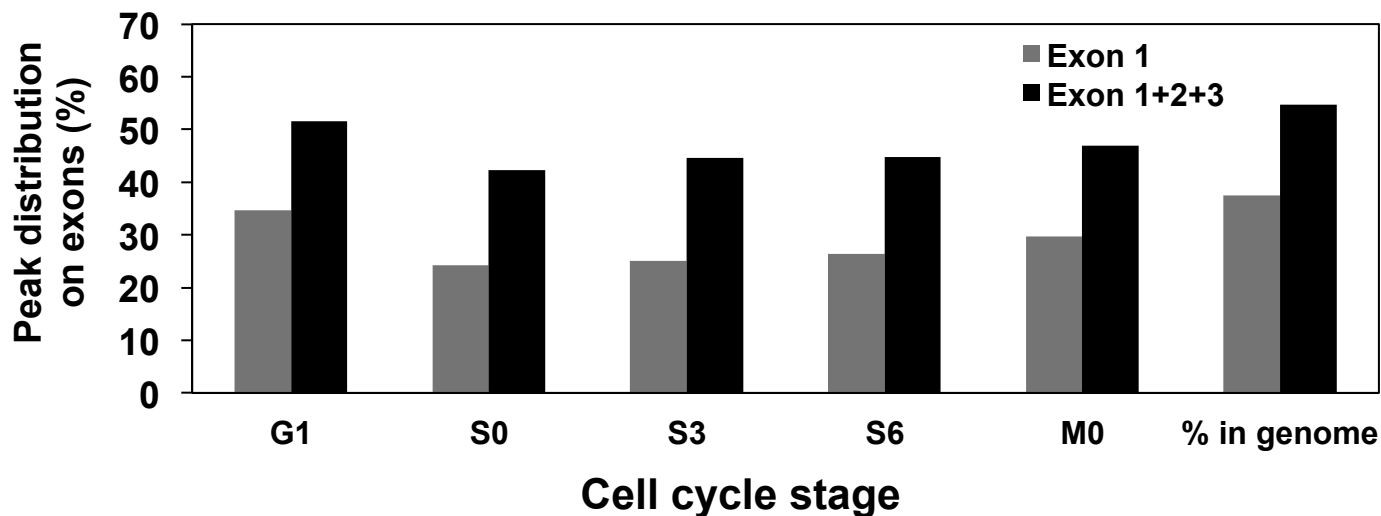

**Figure S4**

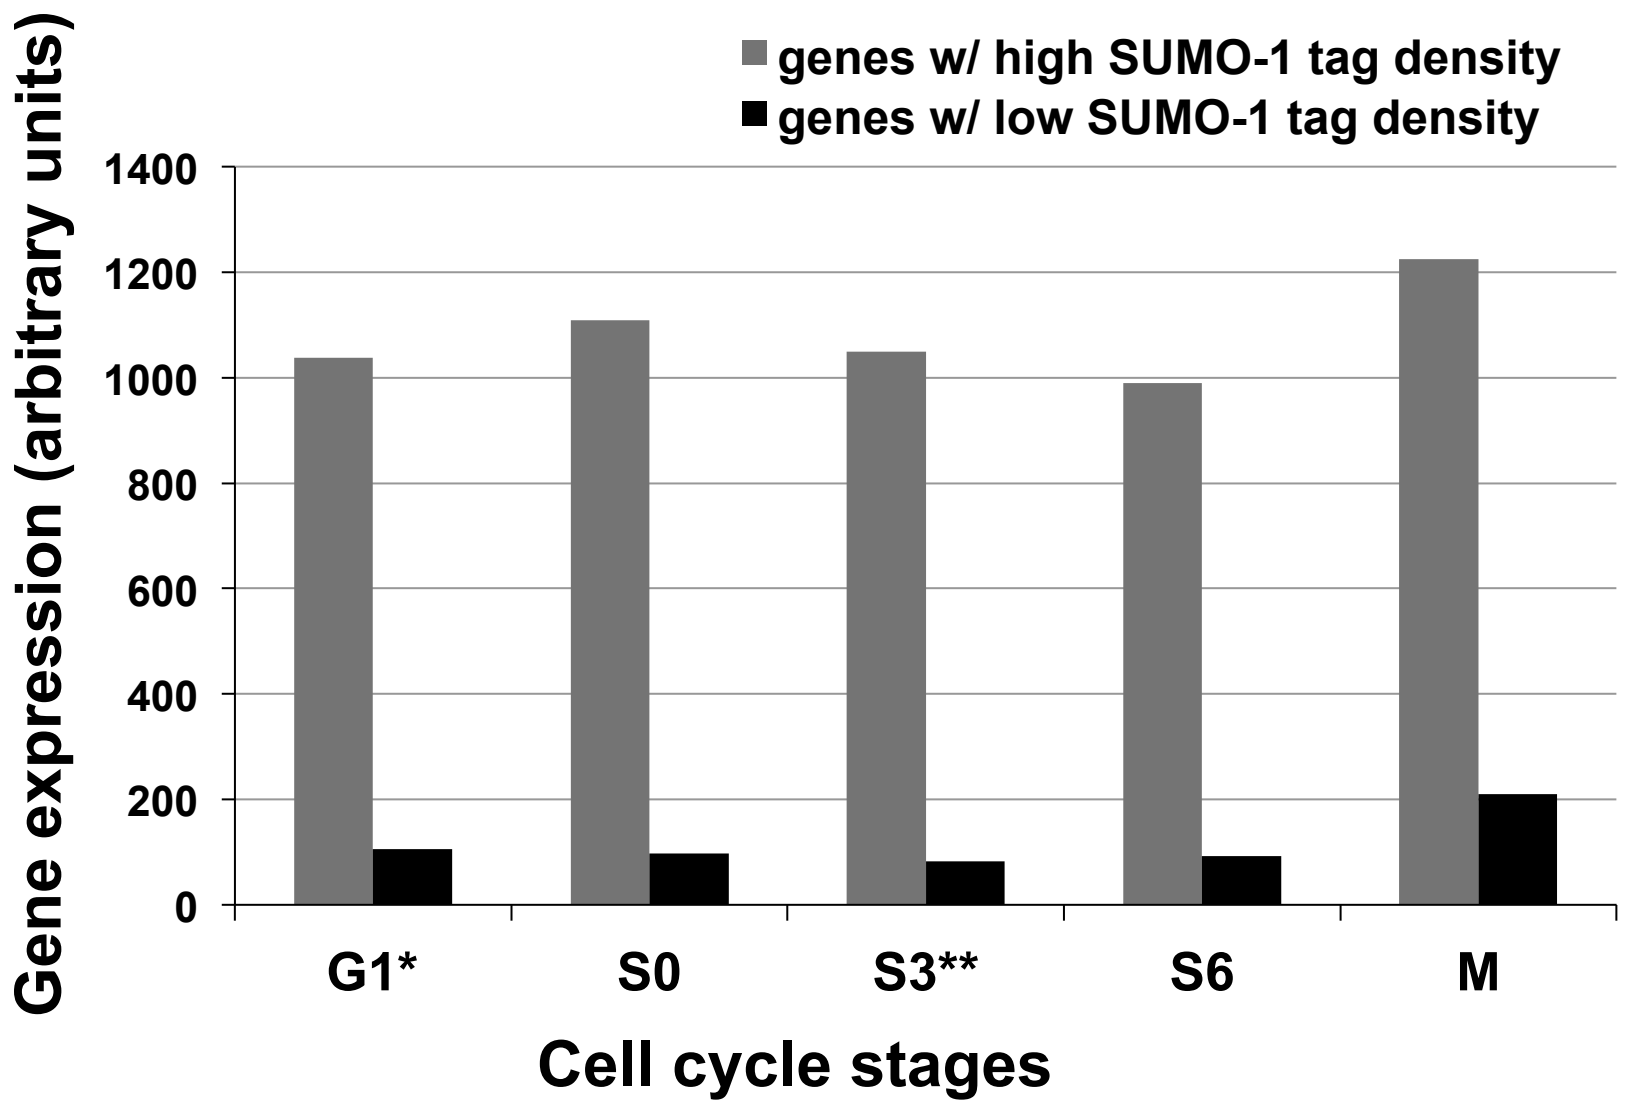



Control si

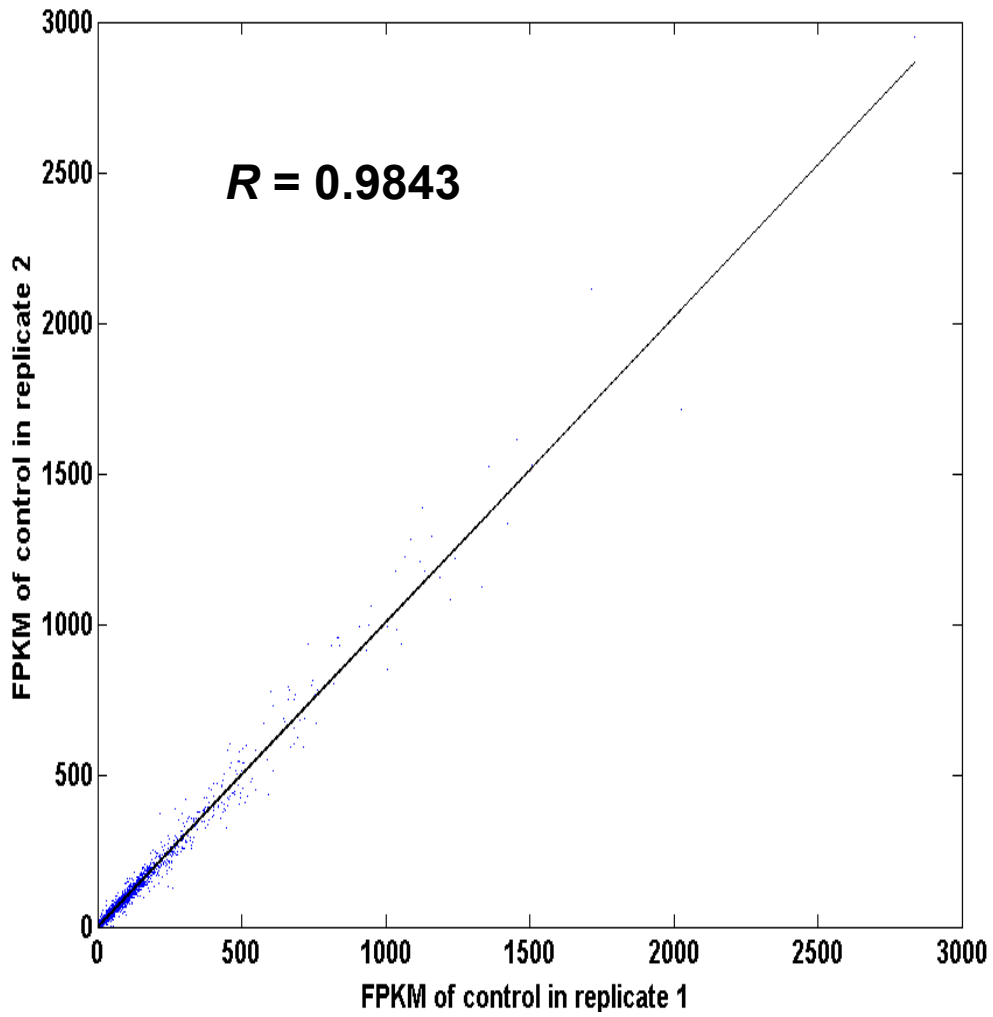

SUMO-1 si

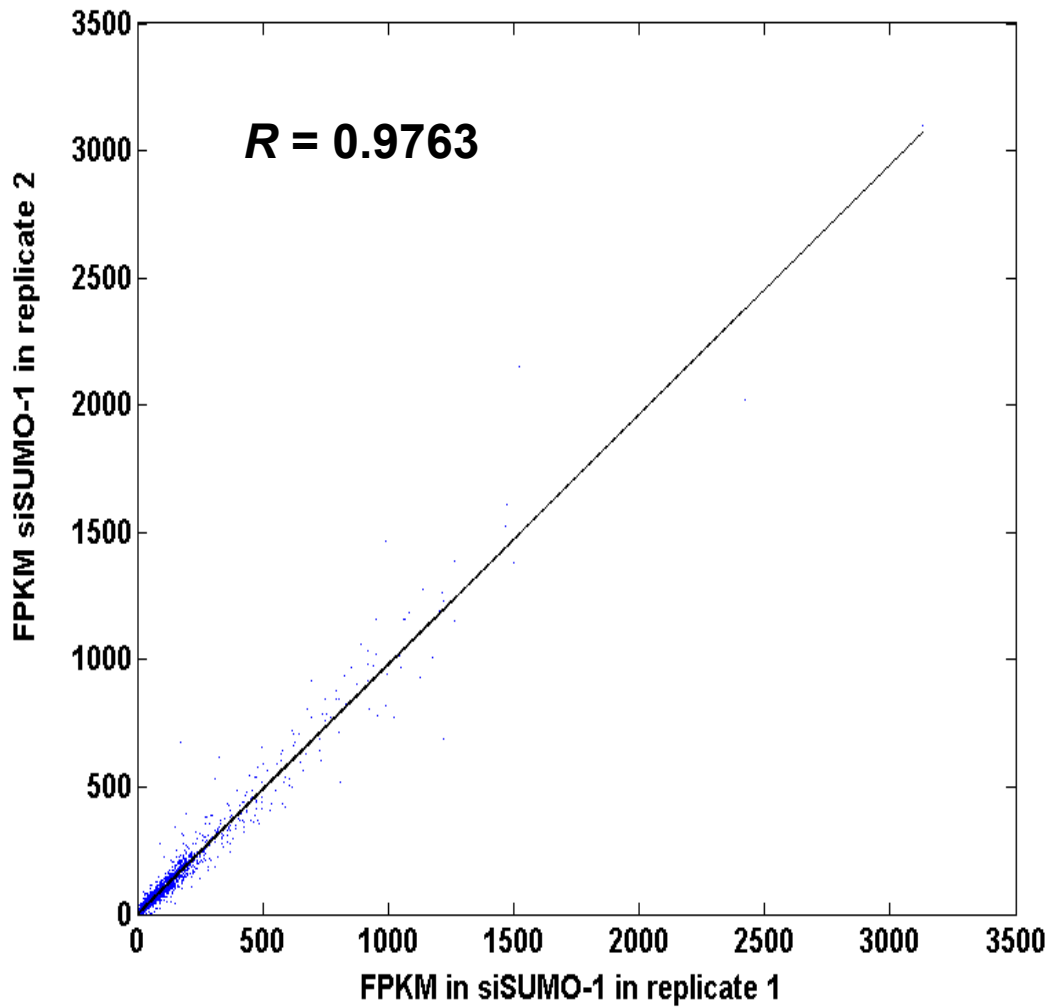

**A**

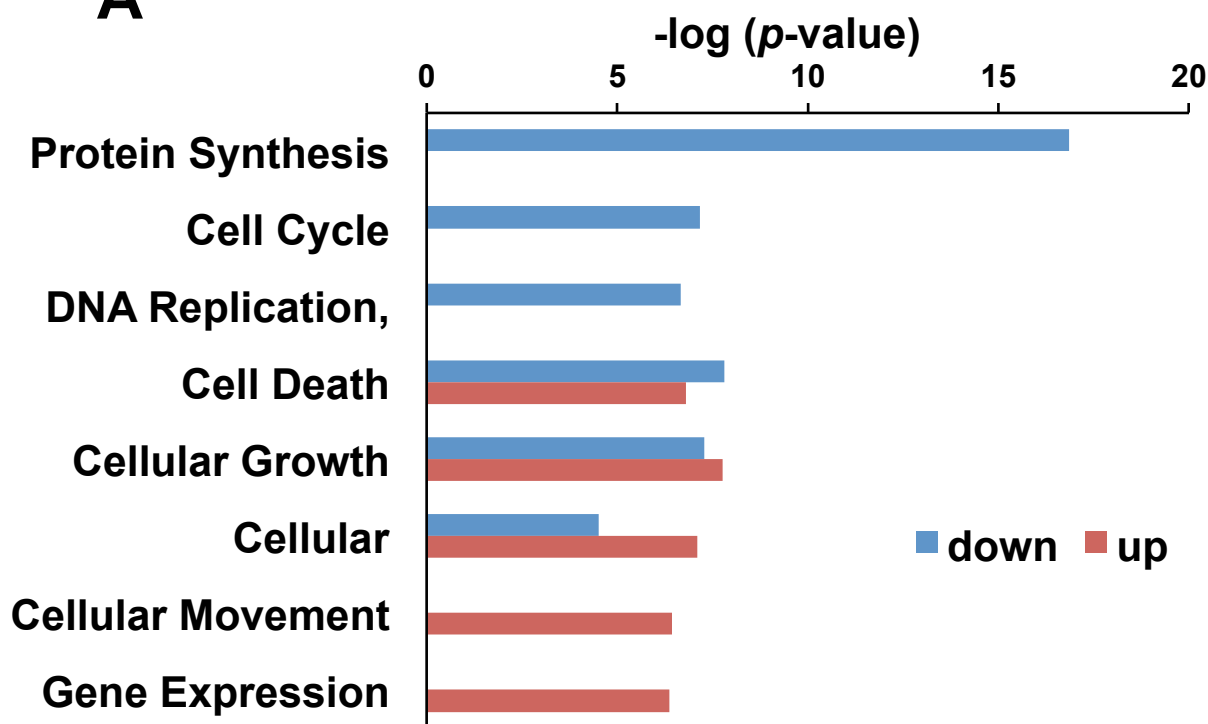

**B**

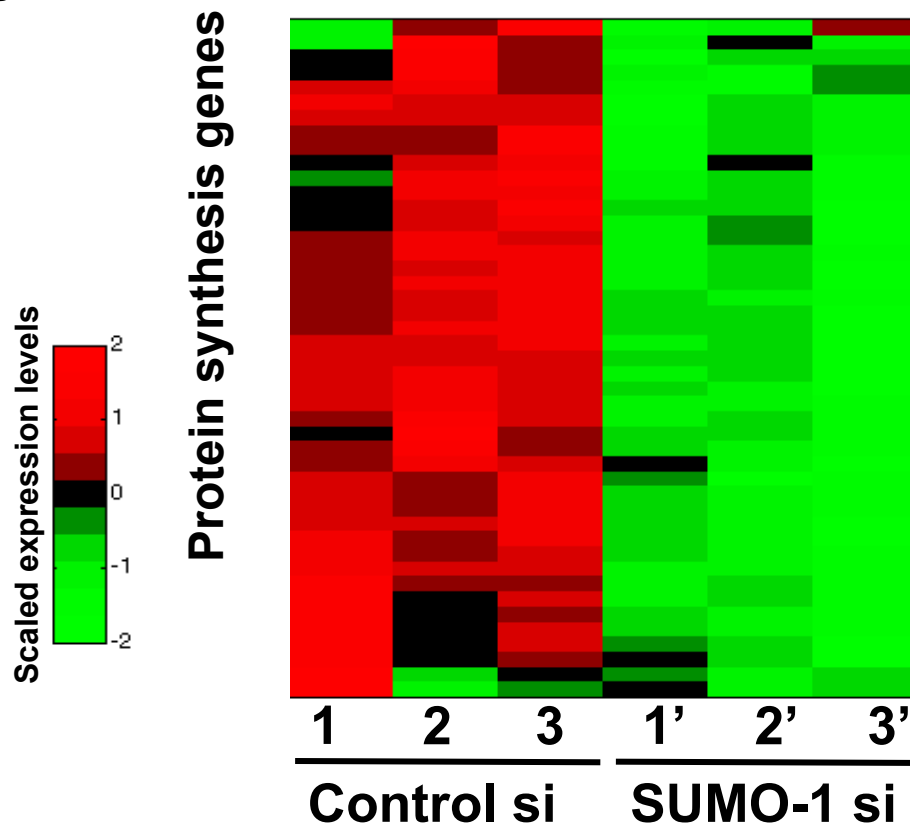

**C**

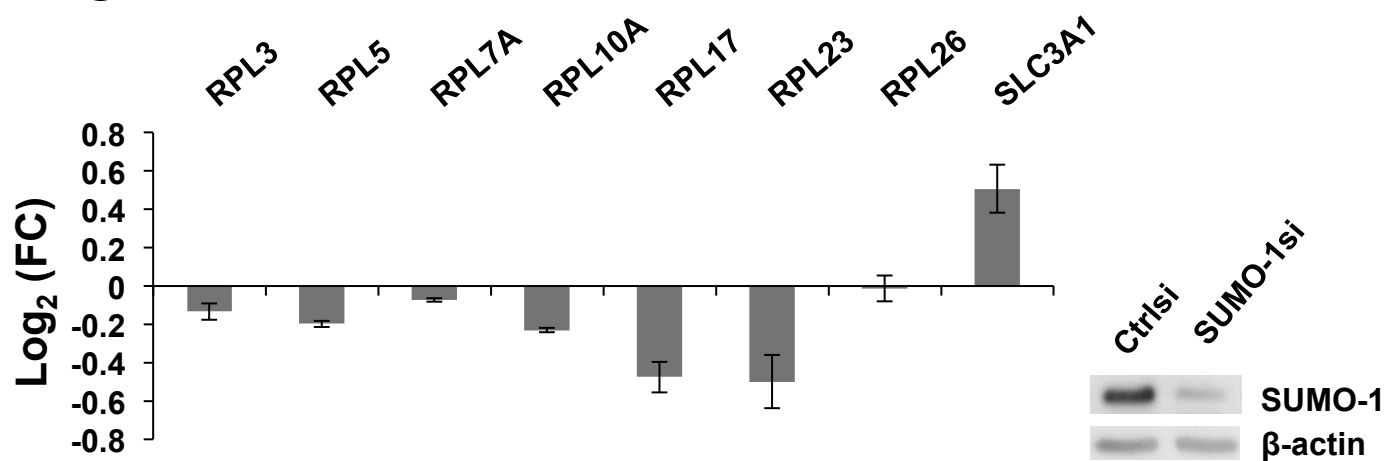

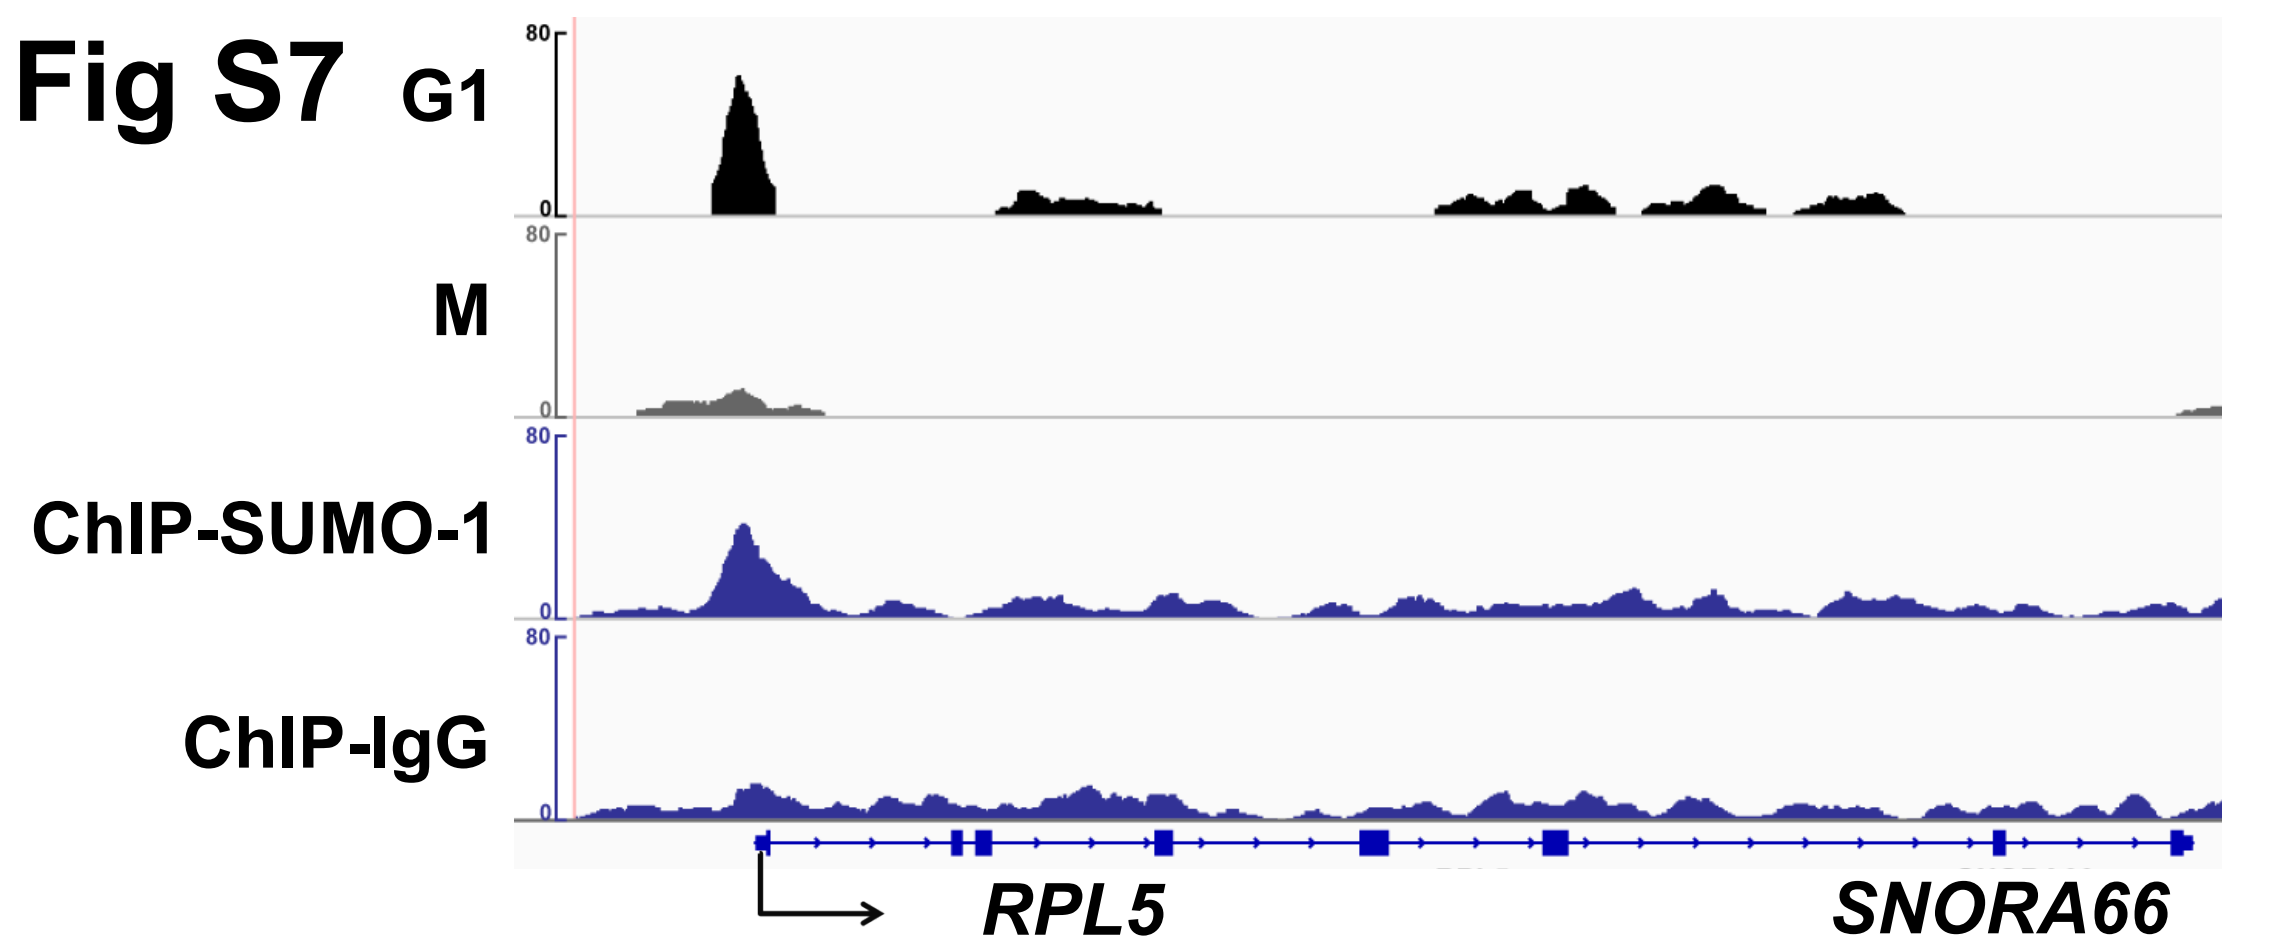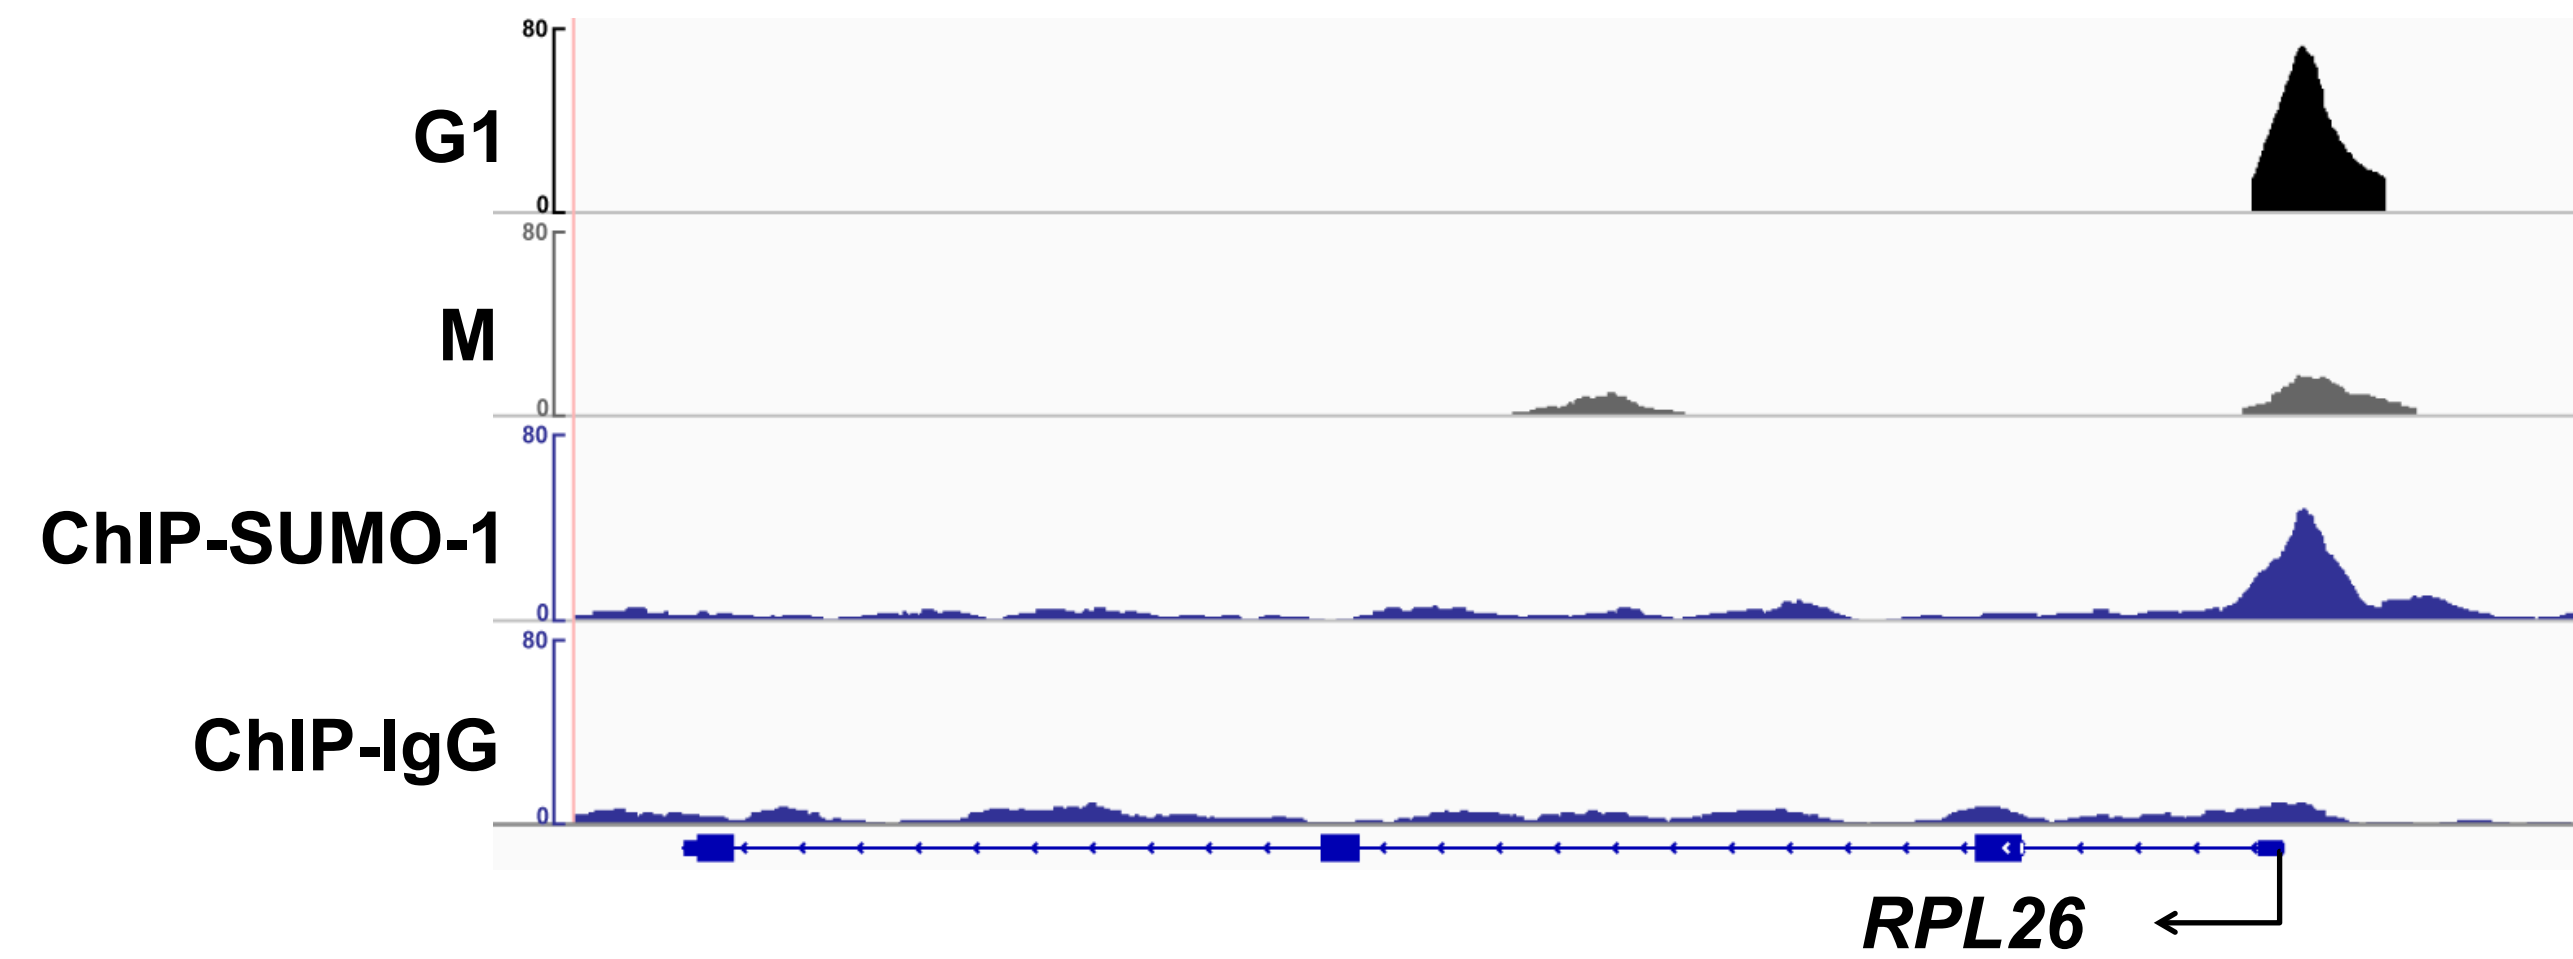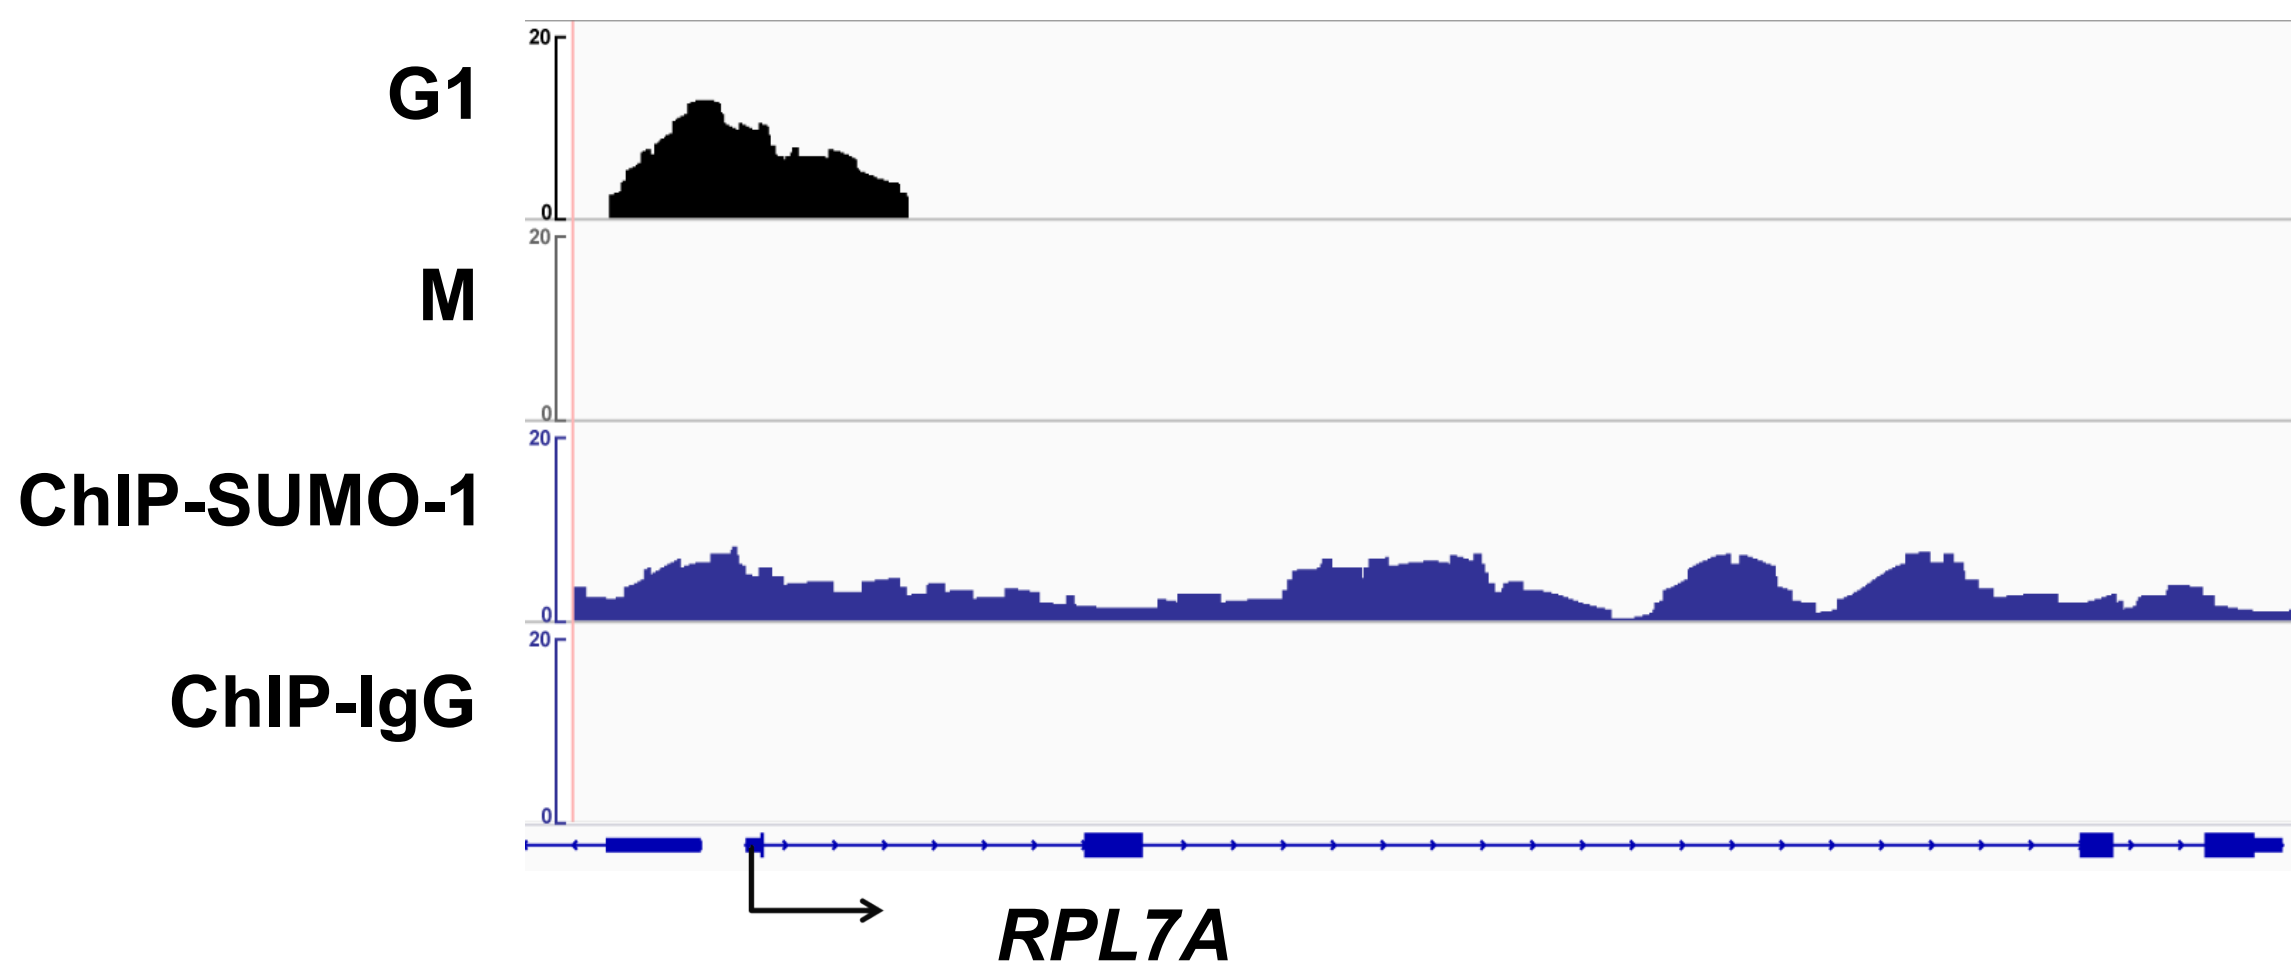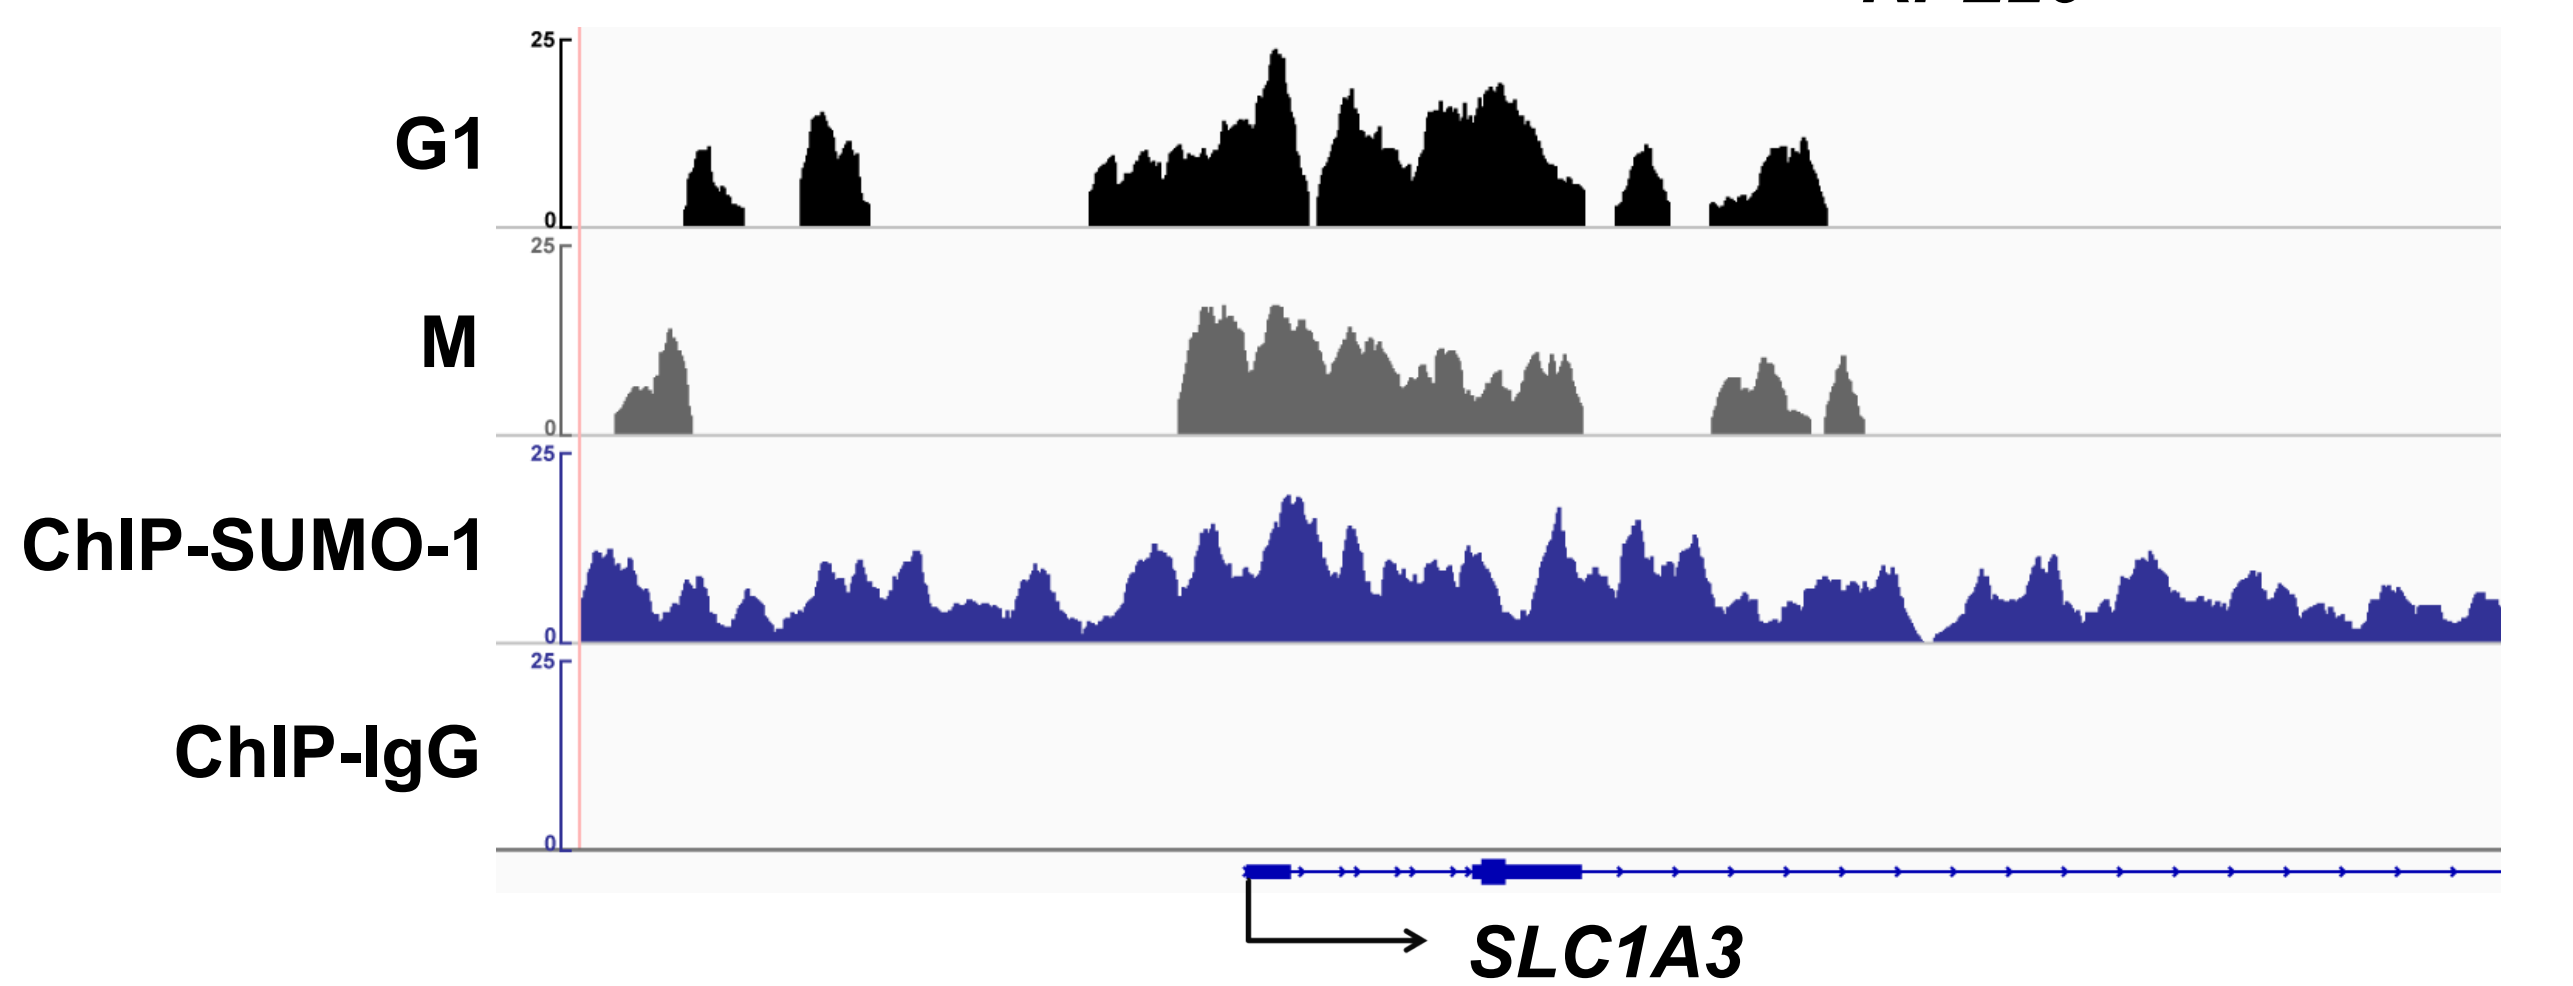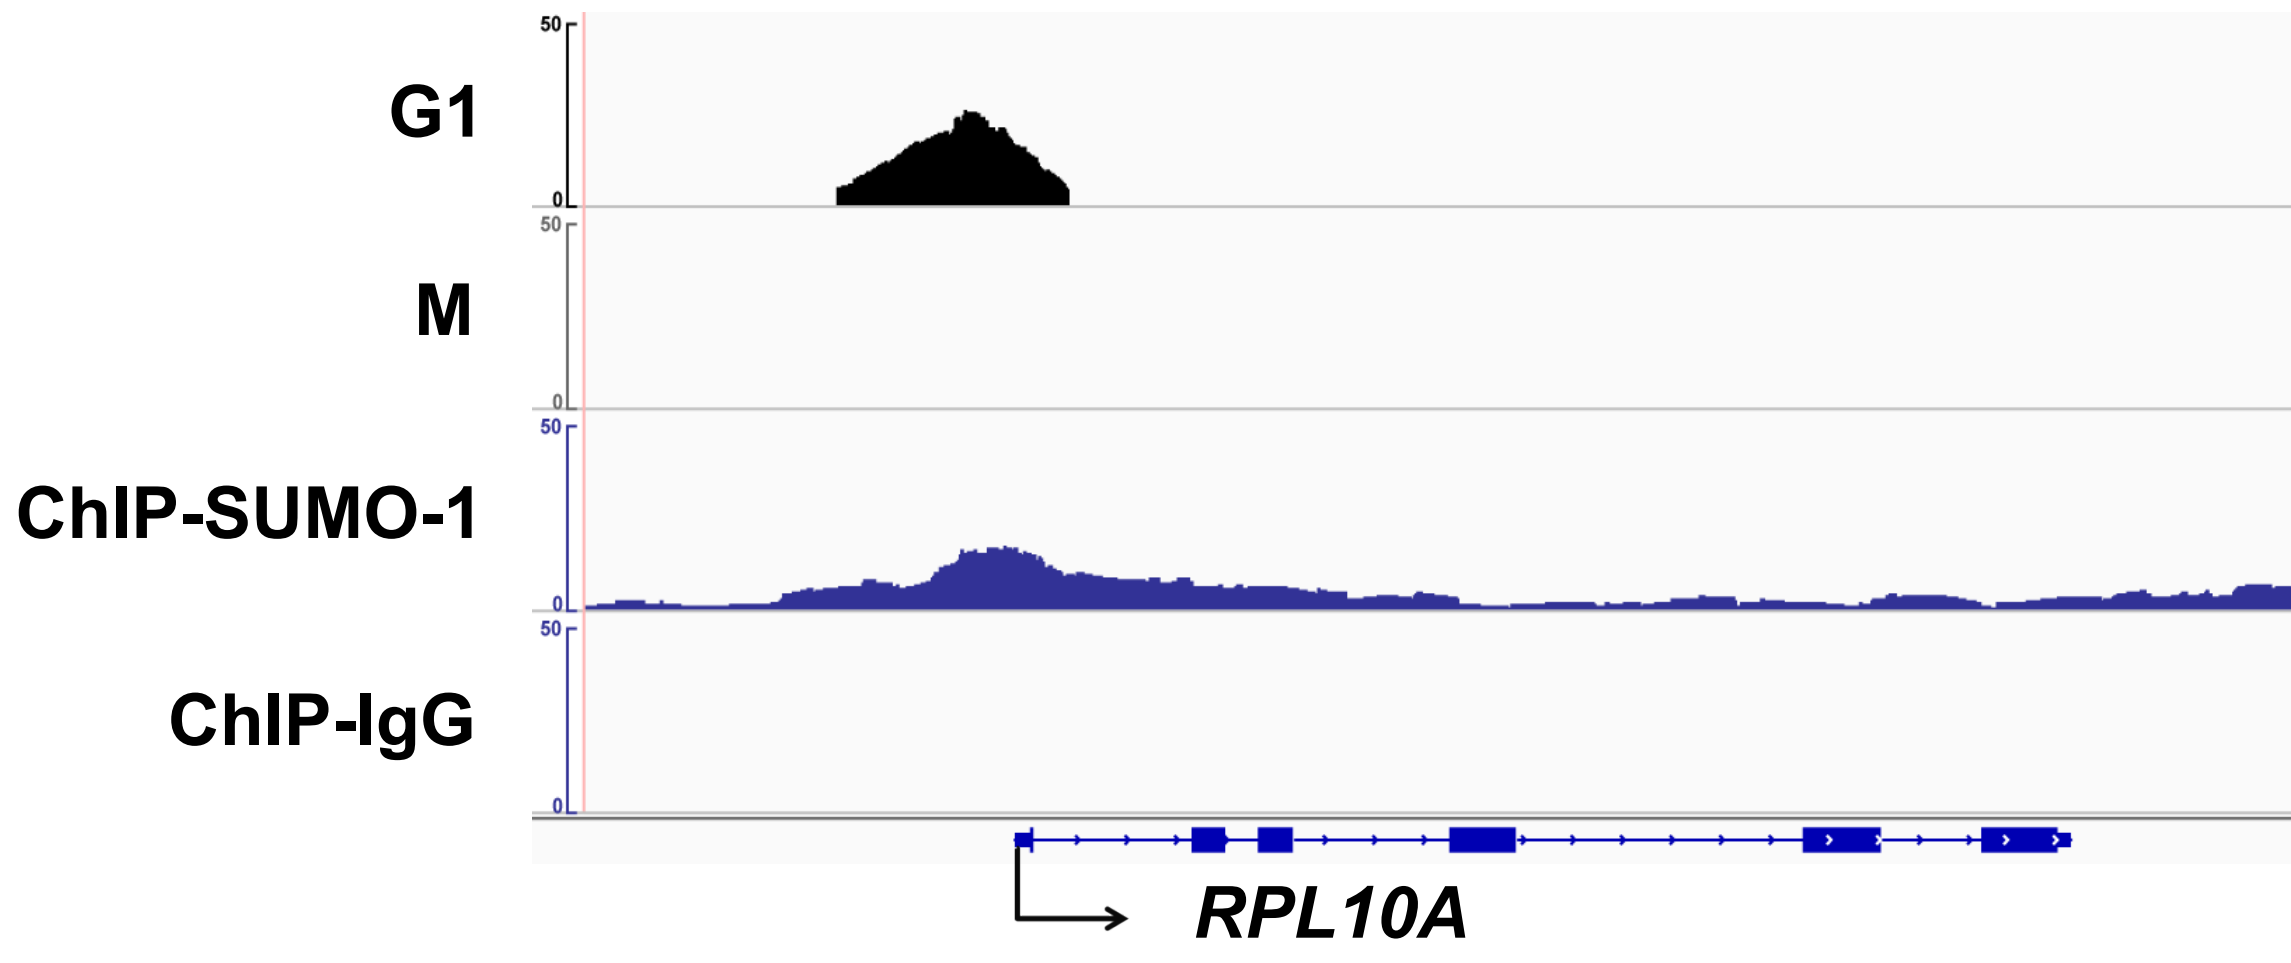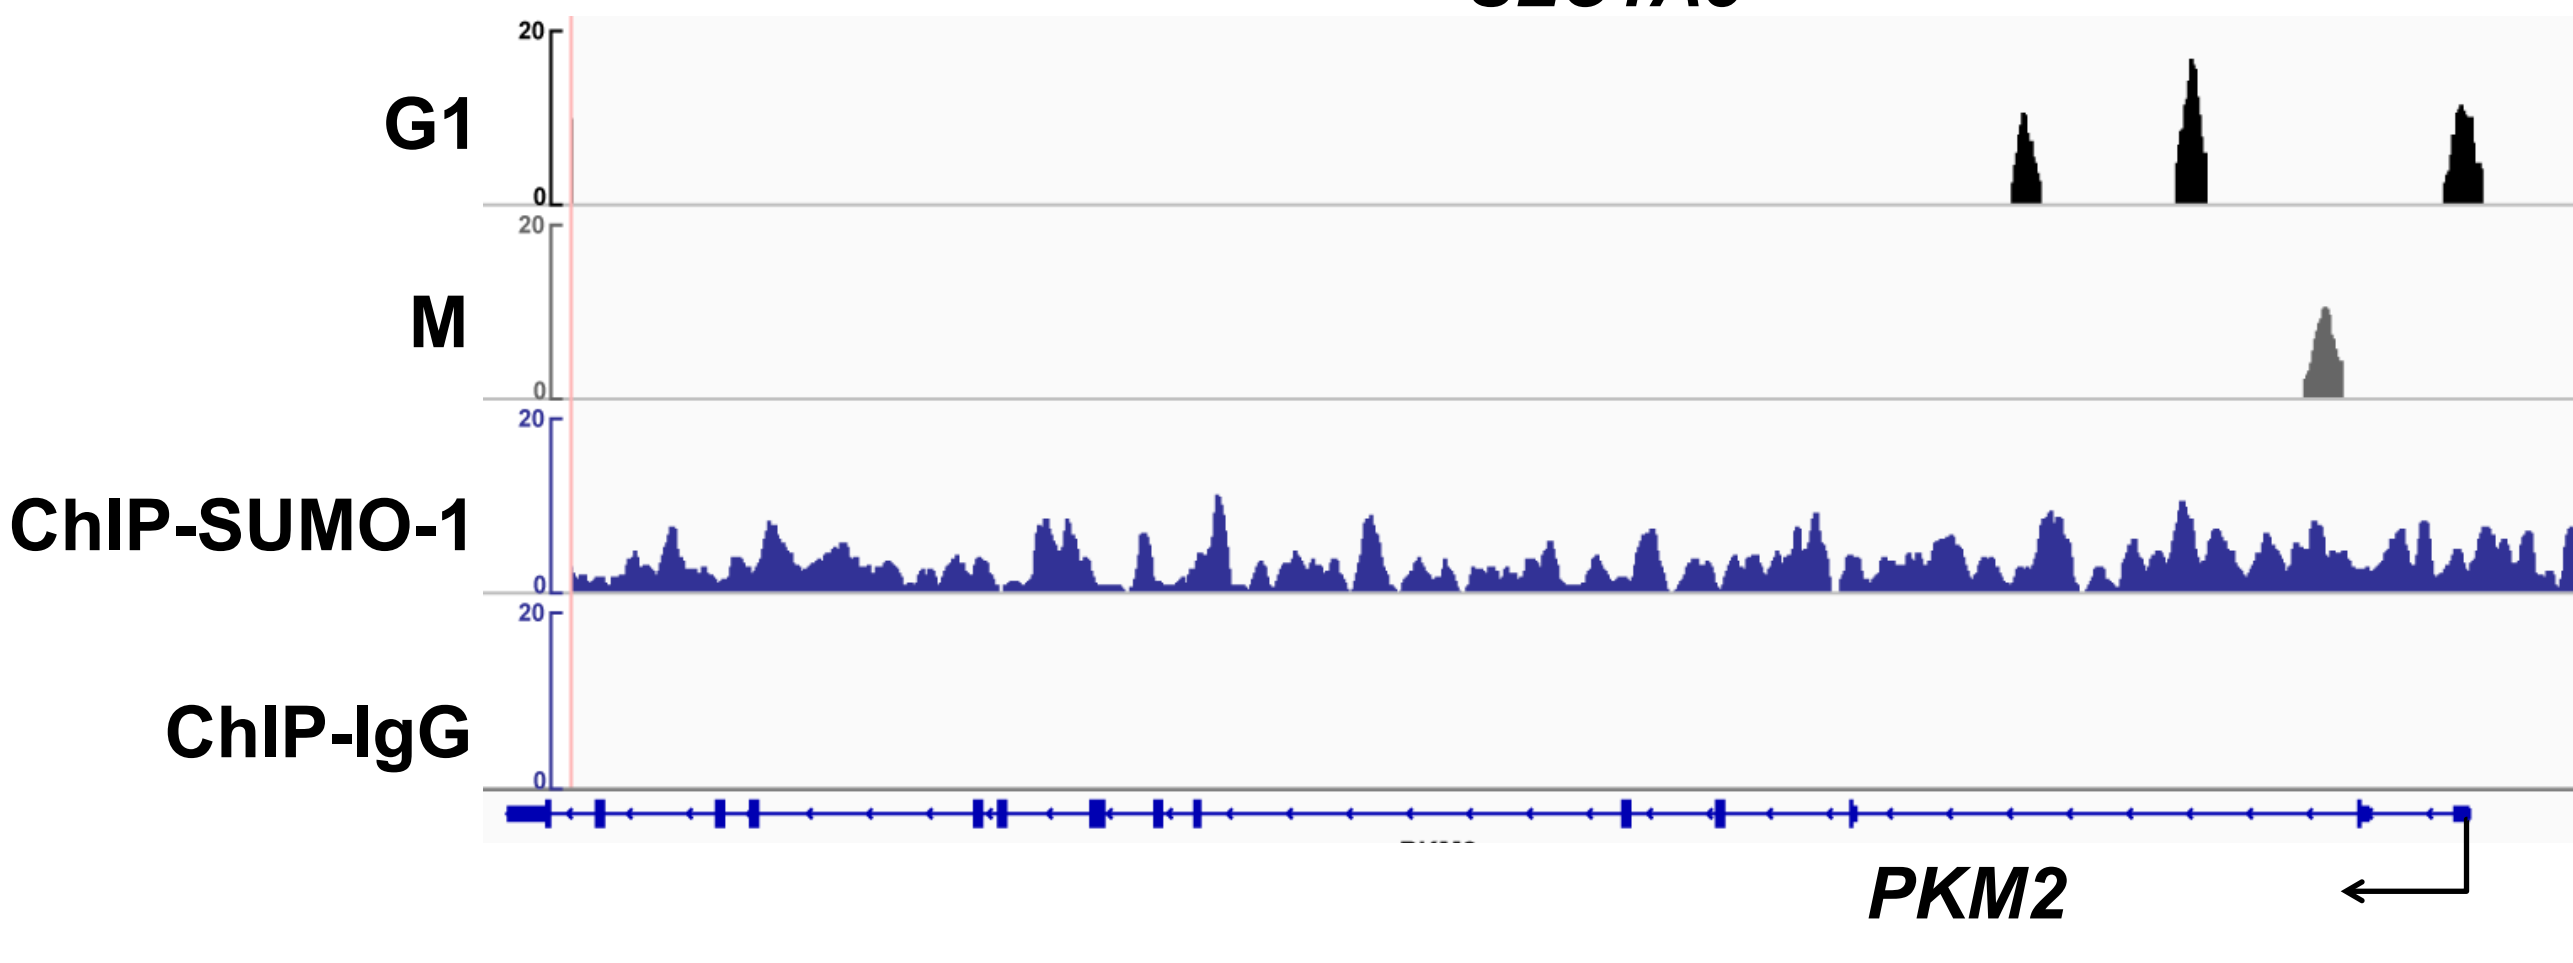

Supplement: supp_gks819_nar-01349-v-2012-File008.pdf [file supp_gks819_nar-01349-v-2012-File008.pdf]
